# Supplementary material for: Larval longevity and competency patterns of Caribbean reef-building corals
Source: PeerJ journal article supplement (doi:10.7717/peerj.9705), 2020-08-12
Supplement: Competency-RawData.xlsx [file Competency-RawData.xlsx]

## Sheet: OfavCompetency
Spp	Year	Cohort	Date	Replicate	dAS	%Settle
Ofav	2013	Of-8-26-13-compA	2013-08-29	Rep1	3	0
Ofav	2013	Of-8-26-13-compA	2013-08-29	Rep10	3	0
Ofav	2013	Of-8-26-13-compA	2013-08-29	Rep11	3	0
Ofav	2013	Of-8-26-13-compA	2013-08-29	Rep12	3	0.05
Ofav	2013	Of-8-26-13-compA	2013-08-29	Rep2	3	0
Ofav	2013	Of-8-26-13-compA	2013-08-29	Rep3	3	0
Ofav	2013	Of-8-26-13-compA	2013-08-29	Rep4	3	0
Ofav	2013	Of-8-26-13-compA	2013-08-29	Rep5	3	0
Ofav	2013	Of-8-26-13-compA	2013-08-29	Rep6	3	0
Ofav	2013	Of-8-26-13-compA	2013-08-29	Rep7	3	0
Ofav	2013	Of-8-26-13-compA	2013-08-29	Rep8	3	0
Ofav	2013	Of-8-26-13-compA	2013-08-29	Rep9	3	0.1
Ofav	2017	Of-8-13-17-comp	2017-08-16	Rep1	3	0
Ofav	2017	Of-8-13-17-comp	2017-08-16	Rep10	3	0
Ofav	2017	Of-8-13-17-comp	2017-08-16	Rep11	3	0
Ofav	2017	Of-8-13-17-comp	2017-08-16	Rep12	3	0
Ofav	2017	Of-8-13-17-comp	2017-08-16	Rep2	3	0
Ofav	2017	Of-8-13-17-comp	2017-08-16	Rep3	3	0
Ofav	2017	Of-8-13-17-comp	2017-08-16	Rep4	3	0
Ofav	2017	Of-8-13-17-comp	2017-08-16	Rep5	3	0
Ofav	2017	Of-8-13-17-comp	2017-08-16	Rep6	3	0
Ofav	2017	Of-8-13-17-comp	2017-08-16	Rep7	3	0
Ofav	2017	Of-8-13-17-comp	2017-08-16	Rep8	3	0
Ofav	2017	Of-8-13-17-comp	2017-08-16	Rep9	3	0.05
Ofav	2013	Of-8-26-13-compA	2013-08-30	Rep1	4	0
Ofav	2013	Of-8-26-13-compA	2013-08-30	Rep10	4	0.45
Ofav	2013	Of-8-26-13-compA	2013-08-30	Rep11	4	0.1
Ofav	2013	Of-8-26-13-compA	2013-08-30	Rep12	4	0.55
Ofav	2013	Of-8-26-13-compA	2013-08-30	Rep2	4	0.3
Ofav	2013	Of-8-26-13-compA	2013-08-30	Rep3	4	0
Ofav	2013	Of-8-26-13-compA	2013-08-30	Rep4	4	0
Ofav	2013	Of-8-26-13-compA	2013-08-30	Rep5	4	0.25
Ofav	2013	Of-8-26-13-compA	2013-08-30	Rep6	4	0.2
Ofav	2013	Of-8-26-13-compA	2013-08-30	Rep7	4	0.4
Ofav	2013	Of-8-26-13-compA	2013-08-30	Rep8	4	0.05
Ofav	2013	Of-8-26-13-compA	2013-08-30	Rep9	4	0.1
Ofav	2014	Of-8-17-14-comp	2014-08-21	Rep1	4	0
Ofav	2014	Of-8-17-14-comp	2014-08-21	Rep10	4	0
Ofav	2014	Of-8-17-14-comp	2014-08-21	Rep11	4	0
Ofav	2014	Of-8-17-14-comp	2014-08-21	Rep12	4	0
Ofav	2014	Of-8-17-14-comp	2014-08-21	Rep2	4	0
Ofav	2014	Of-8-17-14-comp	2014-08-21	Rep3	4	0
Ofav	2014	Of-8-17-14-comp	2014-08-21	Rep4	4	0
Ofav	2014	Of-8-17-14-comp	2014-08-21	Rep5	4	0
Ofav	2014	Of-8-17-14-comp	2014-08-21	Rep6	4	0
Ofav	2014	Of-8-17-14-comp	2014-08-21	Rep7	4	0
Ofav	2014	Of-8-17-14-comp	2014-08-21	Rep8	4	0
Ofav	2014	Of-8-17-14-comp	2014-08-21	Rep9	4	0
Ofav	2015	Of-8-6-15-comp	2015-08-10	Rep1	4	0.05
Ofav	2015	Of-8-6-15-comp	2015-08-10	Rep10	4	0.1
Ofav	2015	Of-8-6-15-comp	2015-08-10	Rep11	4	0.15
Ofav	2015	Of-8-6-15-comp	2015-08-10	Rep12	4	0
Ofav	2015	Of-8-6-15-comp	2015-08-10	Rep2	4	0.35
Ofav	2015	Of-8-6-15-comp	2015-08-10	Rep3	4	0.45
Ofav	2015	Of-8-6-15-comp	2015-08-10	Rep4	4	0.75
Ofav	2015	Of-8-6-15-comp	2015-08-10	Rep5	4	0.35
Ofav	2015	Of-8-6-15-comp	2015-08-10	Rep6	4	0.7
Ofav	2015	Of-8-6-15-comp	2015-08-10	Rep7	4	0.05
Ofav	2015	Of-8-6-15-comp	2015-08-10	Rep8	4	0.05
Ofav	2015	Of-8-6-15-comp	2015-08-10	Rep9	4	0.35
Ofav	2017	Of-8-13-17-comp	2017-08-17	Rep1	4	0.15
Ofav	2017	Of-8-13-17-comp	2017-08-17	Rep10	4	0.3
Ofav	2017	Of-8-13-17-comp	2017-08-17	Rep11	4	0.3
Ofav	2017	Of-8-13-17-comp	2017-08-17	Rep12	4	0.05
Ofav	2017	Of-8-13-17-comp	2017-08-17	Rep2	4	0.05
Ofav	2017	Of-8-13-17-comp	2017-08-17	Rep3	4	0
Ofav	2017	Of-8-13-17-comp	2017-08-17	Rep4	4	0.05
Ofav	2017	Of-8-13-17-comp	2017-08-17	Rep5	4	0.1
Ofav	2017	Of-8-13-17-comp	2017-08-17	Rep6	4	0.1
Ofav	2017	Of-8-13-17-comp	2017-08-17	Rep7	4	0.1
Ofav	2017	Of-8-13-17-comp	2017-08-17	Rep8	4	0.05
Ofav	2017	Of-8-13-17-comp	2017-08-17	Rep9	4	0.1
Ofav	2013	Of-8-26-13-compA	2013-08-31	Rep1	5	0
Ofav	2013	Of-8-26-13-compA	2013-08-31	Rep10	5	0.25
Ofav	2013	Of-8-26-13-compA	2013-08-31	Rep11	5	0
Ofav	2013	Of-8-26-13-compA	2013-08-31	Rep12	5	0
Ofav	2013	Of-8-26-13-compA	2013-08-31	Rep2	5	0
Ofav	2013	Of-8-26-13-compA	2013-08-31	Rep3	5	0
Ofav	2013	Of-8-26-13-compA	2013-08-31	Rep4	5	0.5
Ofav	2013	Of-8-26-13-compA	2013-08-31	Rep5	5	0
Ofav	2013	Of-8-26-13-compA	2013-08-31	Rep6	5	0
Ofav	2013	Of-8-26-13-compA	2013-08-31	Rep7	5	0.25
Ofav	2013	Of-8-26-13-compA	2013-08-31	Rep8	5	0
Ofav	2013	Of-8-26-13-compA	2013-08-31	Rep9	5	0
Ofav	2014	Of-8-17-14-comp	2014-08-22	Rep1	5	0.1
Ofav	2014	Of-8-17-14-comp	2014-08-22	Rep10	5	0
Ofav	2014	Of-8-17-14-comp	2014-08-22	Rep11	5	0.05
Ofav	2014	Of-8-17-14-comp	2014-08-22	Rep12	5	0
Ofav	2014	Of-8-17-14-comp	2014-08-22	Rep2	5	0.05
Ofav	2014	Of-8-17-14-comp	2014-08-22	Rep3	5	0
Ofav	2014	Of-8-17-14-comp	2014-08-22	Rep4	5	0.2
Ofav	2014	Of-8-17-14-comp	2014-08-22	Rep5	5	0
Ofav	2014	Of-8-17-14-comp	2014-08-22	Rep6	5	0
Ofav	2014	Of-8-17-14-comp	2014-08-22	Rep7	5	0
Ofav	2014	Of-8-17-14-comp	2014-08-22	Rep8	5	0
Ofav	2014	Of-8-17-14-comp	2014-08-22	Rep9	5	0
Ofav	2015	Of-8-6-15-comp	2015-08-11	Rep1	5	0
Ofav	2015	Of-8-6-15-comp	2015-08-11	Rep10	5	0.3
Ofav	2015	Of-8-6-15-comp	2015-08-11	Rep11	5	0.15
Ofav	2015	Of-8-6-15-comp	2015-08-11	Rep12	5	0.05
Ofav	2015	Of-8-6-15-comp	2015-08-11	Rep2	5	0
Ofav	2015	Of-8-6-15-comp	2015-08-11	Rep3	5	0.15
Ofav	2015	Of-8-6-15-comp	2015-08-11	Rep4	5	0.15
Ofav	2015	Of-8-6-15-comp	2015-08-11	Rep5	5	0
Ofav	2015	Of-8-6-15-comp	2015-08-11	Rep6	5	0.1
Ofav	2015	Of-8-6-15-comp	2015-08-11	Rep7	5	0.15
Ofav	2015	Of-8-6-15-comp	2015-08-11	Rep8	5	0.1
Ofav	2015	Of-8-6-15-comp	2015-08-11	Rep9	5	0.05
Ofav	2017	Of-8-13-17-comp	2017-08-18	Rep1	5	0.1
Ofav	2017	Of-8-13-17-comp	2017-08-18	Rep10	5	0
Ofav	2017	Of-8-13-17-comp	2017-08-18	Rep11	5	0.7
Ofav	2017	Of-8-13-17-comp	2017-08-18	Rep12	5	0.25
Ofav	2017	Of-8-13-17-comp	2017-08-18	Rep2	5	0.55
Ofav	2017	Of-8-13-17-comp	2017-08-18	Rep3	5	0.35
Ofav	2017	Of-8-13-17-comp	2017-08-18	Rep4	5	0.15
Ofav	2017	Of-8-13-17-comp	2017-08-18	Rep5	5	0.3
Ofav	2017	Of-8-13-17-comp	2017-08-18	Rep6	5	0.35
Ofav	2017	Of-8-13-17-comp	2017-08-18	Rep7	5	0.5
Ofav	2017	Of-8-13-17-comp	2017-08-18	Rep8	5	0.25
Ofav	2017	Of-8-13-17-comp	2017-08-18	Rep9	5	0.15
Ofav	2013	Of-8-26-13-compA	2013-09-01	Rep1	6	0
Ofav	2013	Of-8-26-13-compA	2013-09-01	Rep10	6	0
Ofav	2013	Of-8-26-13-compA	2013-09-01	Rep11	6	0
Ofav	2013	Of-8-26-13-compA	2013-09-01	Rep12	6	0
Ofav	2013	Of-8-26-13-compA	2013-09-01	Rep2	6	0
Ofav	2013	Of-8-26-13-compA	2013-09-01	Rep3	6	0
Ofav	2013	Of-8-26-13-compA	2013-09-01	Rep4	6	0
Ofav	2013	Of-8-26-13-compA	2013-09-01	Rep5	6	0
Ofav	2013	Of-8-26-13-compA	2013-09-01	Rep6	6	0.55
Ofav	2013	Of-8-26-13-compA	2013-09-01	Rep7	6	0
Ofav	2013	Of-8-26-13-compA	2013-09-01	Rep8	6	0
Ofav	2013	Of-8-26-13-compA	2013-09-01	Rep9	6	0.05
Ofav	2014	Of-8-17-14-comp	2014-08-23	Rep1	6	0.15
Ofav	2014	Of-8-17-14-comp	2014-08-23	Rep10	6	0
Ofav	2014	Of-8-17-14-comp	2014-08-23	Rep11	6	0.05
Ofav	2014	Of-8-17-14-comp	2014-08-23	Rep12	6	0.1
Ofav	2014	Of-8-17-14-comp	2014-08-23	Rep2	6	0
Ofav	2014	Of-8-17-14-comp	2014-08-23	Rep3	6	0
Ofav	2014	Of-8-17-14-comp	2014-08-23	Rep4	6	0
Ofav	2014	Of-8-17-14-comp	2014-08-23	Rep5	6	0.25
Ofav	2014	Of-8-17-14-comp	2014-08-23	Rep6	6	0
Ofav	2014	Of-8-17-14-comp	2014-08-23	Rep7	6	0.1
Ofav	2014	Of-8-17-14-comp	2014-08-23	Rep8	6	0
Ofav	2014	Of-8-17-14-comp	2014-08-23	Rep9	6	0.15
Ofav	2015	Of-8-6-15-comp	2015-08-13	Rep1	6	0.45
Ofav	2015	Of-8-6-15-comp	2015-08-13	Rep10	6	0
Ofav	2015	Of-8-6-15-comp	2015-08-13	Rep11	6	0.4
Ofav	2015	Of-8-6-15-comp	2015-08-13	Rep12	6	0.5
Ofav	2015	Of-8-6-15-comp	2015-08-13	Rep2	6	0.25
Ofav	2015	Of-8-6-15-comp	2015-08-13	Rep3	6	0.3
Ofav	2015	Of-8-6-15-comp	2015-08-13	Rep4	6	0
Ofav	2015	Of-8-6-15-comp	2015-08-13	Rep5	6	0.7
Ofav	2015	Of-8-6-15-comp	2015-08-13	Rep6	6	0.5
Ofav	2015	Of-8-6-15-comp	2015-08-13	Rep7	6	0.35
Ofav	2015	Of-8-6-15-comp	2015-08-13	Rep8	6	0.7
Ofav	2015	Of-8-6-15-comp	2015-08-13	Rep9	6	0.7
Ofav	2017	Of-8-13-17-comp	2017-08-19	Rep1	6	0.2
Ofav	2017	Of-8-13-17-comp	2017-08-19	Rep10	6	0.15
Ofav	2017	Of-8-13-17-comp	2017-08-19	Rep11	6	0.6
Ofav	2017	Of-8-13-17-comp	2017-08-19	Rep12	6	0.35
Ofav	2017	Of-8-13-17-comp	2017-08-19	Rep2	6	0.35
Ofav	2017	Of-8-13-17-comp	2017-08-19	Rep3	6	0
Ofav	2017	Of-8-13-17-comp	2017-08-19	Rep4	6	0.4
Ofav	2017	Of-8-13-17-comp	2017-08-19	Rep5	6	0.55
Ofav	2017	Of-8-13-17-comp	2017-08-19	Rep6	6	0.25
Ofav	2017	Of-8-13-17-comp	2017-08-19	Rep7	6	0.1
Ofav	2017	Of-8-13-17-comp	2017-08-19	Rep8	6	0.2
Ofav	2017	Of-8-13-17-comp	2017-08-19	Rep9	6	0.45
Ofav	2013	Of-8-26-13-compA	2013-09-02	Rep1	7	0.1
Ofav	2013	Of-8-26-13-compA	2013-09-02	Rep10	7	0.15
Ofav	2013	Of-8-26-13-compA	2013-09-02	Rep11	7	0.3
Ofav	2013	Of-8-26-13-compA	2013-09-02	Rep12	7	0
Ofav	2013	Of-8-26-13-compA	2013-09-02	Rep2	7	0.05
Ofav	2013	Of-8-26-13-compA	2013-09-02	Rep3	7	0
Ofav	2013	Of-8-26-13-compA	2013-09-02	Rep4	7	0.25
Ofav	2013	Of-8-26-13-compA	2013-09-02	Rep5	7	0.1
Ofav	2013	Of-8-26-13-compA	2013-09-02	Rep6	7	0.15
Ofav	2013	Of-8-26-13-compA	2013-09-02	Rep7	7	0.05
Ofav	2013	Of-8-26-13-compA	2013-09-02	Rep8	7	0.05
Ofav	2013	Of-8-26-13-compA	2013-09-02	Rep9	7	0.1
Ofav	2014	Of-8-17-14-comp	2014-08-24	Rep1	7	0
Ofav	2014	Of-8-17-14-comp	2014-08-24	Rep10	7	0.05
Ofav	2014	Of-8-17-14-comp	2014-08-24	Rep11	7	0.1
Ofav	2014	Of-8-17-14-comp	2014-08-24	Rep12	7	0.1
Ofav	2014	Of-8-17-14-comp	2014-08-24	Rep2	7	0.2
Ofav	2014	Of-8-17-14-comp	2014-08-24	Rep3	7	0.15
Ofav	2014	Of-8-17-14-comp	2014-08-24	Rep4	7	0.4
Ofav	2014	Of-8-17-14-comp	2014-08-24	Rep5	7	0.25
Ofav	2014	Of-8-17-14-comp	2014-08-24	Rep6	7	0.2
Ofav	2014	Of-8-17-14-comp	2014-08-24	Rep7	7	0.2
Ofav	2014	Of-8-17-14-comp	2014-08-24	Rep8	7	0.15
Ofav	2014	Of-8-17-14-comp	2014-08-24	Rep9	7	0
Ofav	2015	Of-8-6-15-comp	2015-08-14	Rep1	7	0.8
Ofav	2015	Of-8-6-15-comp	2015-08-14	Rep10	7	0.55
Ofav	2015	Of-8-6-15-comp	2015-08-14	Rep11	7	0.15
Ofav	2015	Of-8-6-15-comp	2015-08-14	Rep12	7	0.35
Ofav	2015	Of-8-6-15-comp	2015-08-14	Rep2	7	0.8
Ofav	2015	Of-8-6-15-comp	2015-08-14	Rep3	7	0.7
Ofav	2015	Of-8-6-15-comp	2015-08-14	Rep4	7	0.25
Ofav	2015	Of-8-6-15-comp	2015-08-14	Rep5	7	0.5
Ofav	2015	Of-8-6-15-comp	2015-08-14	Rep6	7	0.05
Ofav	2015	Of-8-6-15-comp	2015-08-14	Rep7	7	0.8
Ofav	2015	Of-8-6-15-comp	2015-08-14	Rep8	7	0.7
Ofav	2015	Of-8-6-15-comp	2015-08-14	Rep9	7	0.8
Ofav	2017	Of-8-13-17-comp	2017-08-20	Rep1	7	0.5
Ofav	2017	Of-8-13-17-comp	2017-08-20	Rep10	7	0.3
Ofav	2017	Of-8-13-17-comp	2017-08-20	Rep11	7	0.45
Ofav	2017	Of-8-13-17-comp	2017-08-20	Rep12	7	0.75
Ofav	2017	Of-8-13-17-comp	2017-08-20	Rep2	7	0.45
Ofav	2017	Of-8-13-17-comp	2017-08-20	Rep3	7	0.2
Ofav	2017	Of-8-13-17-comp	2017-08-20	Rep4	7	0.2
Ofav	2017	Of-8-13-17-comp	2017-08-20	Rep5	7	0.3
Ofav	2017	Of-8-13-17-comp	2017-08-20	Rep6	7	0.3
Ofav	2017	Of-8-13-17-comp	2017-08-20	Rep7	7	0.45
Ofav	2017	Of-8-13-17-comp	2017-08-20	Rep8	7	0.55
Ofav	2017	Of-8-13-17-comp	2017-08-20	Rep9	7	0.65
Ofav	2013	Of-8-26-13-compA	2013-09-03	Rep1	8	0
Ofav	2013	Of-8-26-13-compA	2013-09-03	Rep10	8	0.05
Ofav	2013	Of-8-26-13-compA	2013-09-03	Rep11	8	0.3
Ofav	2013	Of-8-26-13-compA	2013-09-03	Rep12	8	0.4
Ofav	2013	Of-8-26-13-compA	2013-09-03	Rep2	8	0.1
Ofav	2013	Of-8-26-13-compA	2013-09-03	Rep3	8	0.35
Ofav	2013	Of-8-26-13-compA	2013-09-03	Rep4	8	0
Ofav	2013	Of-8-26-13-compA	2013-09-03	Rep5	8	0.35
Ofav	2013	Of-8-26-13-compA	2013-09-03	Rep6	8	0
Ofav	2013	Of-8-26-13-compA	2013-09-03	Rep7	8	0.2
Ofav	2013	Of-8-26-13-compA	2013-09-03	Rep8	8	0.05
Ofav	2013	Of-8-26-13-compA	2013-09-03	Rep9	8	0
Ofav	2014	Of-8-17-14-comp	2014-08-25	Rep1	8	0
Ofav	2014	Of-8-17-14-comp	2014-08-25	Rep10	8	0.15
Ofav	2014	Of-8-17-14-comp	2014-08-25	Rep11	8	0.1
Ofav	2014	Of-8-17-14-comp	2014-08-25	Rep12	8	0
Ofav	2014	Of-8-17-14-comp	2014-08-25	Rep2	8	0.15
Ofav	2014	Of-8-17-14-comp	2014-08-25	Rep3	8	0
Ofav	2014	Of-8-17-14-comp	2014-08-25	Rep4	8	0.05
Ofav	2014	Of-8-17-14-comp	2014-08-25	Rep5	8	0.05
Ofav	2014	Of-8-17-14-comp	2014-08-25	Rep6	8	0
Ofav	2014	Of-8-17-14-comp	2014-08-25	Rep7	8	0.05
Ofav	2014	Of-8-17-14-comp	2014-08-25	Rep8	8	0
Ofav	2014	Of-8-17-14-comp	2014-08-25	Rep9	8	0.1
Ofav	2015	Of-8-6-15-comp	2015-08-15	Rep1	8	0.5
Ofav	2015	Of-8-6-15-comp	2015-08-15	Rep10	8	0.1
Ofav	2015	Of-8-6-15-comp	2015-08-15	Rep11	8	0.75
Ofav	2015	Of-8-6-15-comp	2015-08-15	Rep12	8	0.3
Ofav	2015	Of-8-6-15-comp	2015-08-15	Rep2	8	0.5
Ofav	2015	Of-8-6-15-comp	2015-08-15	Rep3	8	0
Ofav	2015	Of-8-6-15-comp	2015-08-15	Rep4	8	0.35
Ofav	2015	Of-8-6-15-comp	2015-08-15	Rep5	8	0.35
Ofav	2015	Of-8-6-15-comp	2015-08-15	Rep6	8	0
Ofav	2015	Of-8-6-15-comp	2015-08-15	Rep7	8	0
Ofav	2015	Of-8-6-15-comp	2015-08-15	Rep8	8	0.4
Ofav	2015	Of-8-6-15-comp	2015-08-15	Rep9	8	0.55
Ofav	2017	Of-8-13-17-comp	2017-08-21	Rep1	8	0.85
Ofav	2017	Of-8-13-17-comp	2017-08-21	Rep10	8	0.4
Ofav	2017	Of-8-13-17-comp	2017-08-21	Rep11	8	0.55
Ofav	2017	Of-8-13-17-comp	2017-08-21	Rep12	8	0.55
Ofav	2017	Of-8-13-17-comp	2017-08-21	Rep2	8	0.3
Ofav	2017	Of-8-13-17-comp	2017-08-21	Rep3	8	0.5
Ofav	2017	Of-8-13-17-comp	2017-08-21	Rep4	8	0.1
Ofav	2017	Of-8-13-17-comp	2017-08-21	Rep5	8	0.45
Ofav	2017	Of-8-13-17-comp	2017-08-21	Rep6	8	0.6
Ofav	2017	Of-8-13-17-comp	2017-08-21	Rep7	8	0.5
Ofav	2017	Of-8-13-17-comp	2017-08-21	Rep8	8	0.9
Ofav	2017	Of-8-13-17-comp	2017-08-21	Rep9	8	0.85
Ofav	2013	Of-8-26-13-compA	2013-09-04	Rep1	9	0.45
Ofav	2013	Of-8-26-13-compA	2013-09-04	Rep10	9	0
Ofav	2013	Of-8-26-13-compA	2013-09-04	Rep11	9	0.2
Ofav	2013	Of-8-26-13-compA	2013-09-04	Rep12	9	0
Ofav	2013	Of-8-26-13-compA	2013-09-04	Rep2	9	0
Ofav	2013	Of-8-26-13-compA	2013-09-04	Rep3	9	0
Ofav	2013	Of-8-26-13-compA	2013-09-04	Rep4	9	0
Ofav	2013	Of-8-26-13-compA	2013-09-04	Rep5	9	0.45
Ofav	2013	Of-8-26-13-compA	2013-09-04	Rep6	9	0
Ofav	2013	Of-8-26-13-compA	2013-09-04	Rep7	9	0.05
Ofav	2013	Of-8-26-13-compA	2013-09-04	Rep8	9	0.15
Ofav	2013	Of-8-26-13-compA	2013-09-04	Rep9	9	0.1
Ofav	2014	Of-8-17-14-comp	2014-08-26	Rep1	9	0.15
Ofav	2014	Of-8-17-14-comp	2014-08-26	Rep10	9	0.15
Ofav	2014	Of-8-17-14-comp	2014-08-26	Rep11	9	0
Ofav	2014	Of-8-17-14-comp	2014-08-26	Rep12	9	0.1
Ofav	2014	Of-8-17-14-comp	2014-08-26	Rep2	9	0.05
Ofav	2014	Of-8-17-14-comp	2014-08-26	Rep3	9	0.1
Ofav	2014	Of-8-17-14-comp	2014-08-26	Rep4	9	0.25
Ofav	2014	Of-8-17-14-comp	2014-08-26	Rep5	9	0.15
Ofav	2014	Of-8-17-14-comp	2014-08-26	Rep6	9	0
Ofav	2014	Of-8-17-14-comp	2014-08-26	Rep7	9	0
Ofav	2014	Of-8-17-14-comp	2014-08-26	Rep8	9	0
Ofav	2014	Of-8-17-14-comp	2014-08-26	Rep9	9	0.2
Ofav	2015	Of-8-6-15-comp	2015-08-16	Rep1	9	0.3
Ofav	2015	Of-8-6-15-comp	2015-08-16	Rep10	9	0.1
Ofav	2015	Of-8-6-15-comp	2015-08-16	Rep11	9	0.7
Ofav	2015	Of-8-6-15-comp	2015-08-16	Rep12	9	0.6
Ofav	2015	Of-8-6-15-comp	2015-08-16	Rep2	9	0.65
Ofav	2015	Of-8-6-15-comp	2015-08-16	Rep3	9	0.25
Ofav	2015	Of-8-6-15-comp	2015-08-16	Rep4	9	0.4
Ofav	2015	Of-8-6-15-comp	2015-08-16	Rep5	9	0.35
Ofav	2015	Of-8-6-15-comp	2015-08-16	Rep6	9	0.1
Ofav	2015	Of-8-6-15-comp	2015-08-16	Rep7	9	0.45
Ofav	2015	Of-8-6-15-comp	2015-08-16	Rep8	9	0.4
Ofav	2015	Of-8-6-15-comp	2015-08-16	Rep9	9	0.5
Ofav	2017	Of-8-13-17-comp	2017-08-22	Rep1	9	0.45
Ofav	2017	Of-8-13-17-comp	2017-08-22	Rep10	9	0.55
Ofav	2017	Of-8-13-17-comp	2017-08-22	Rep11	9	0.3
Ofav	2017	Of-8-13-17-comp	2017-08-22	Rep12	9	0.6
Ofav	2017	Of-8-13-17-comp	2017-08-22	Rep2	9	0.9
Ofav	2017	Of-8-13-17-comp	2017-08-22	Rep3	9	0.45
Ofav	2017	Of-8-13-17-comp	2017-08-22	Rep4	9	0.35
Ofav	2017	Of-8-13-17-comp	2017-08-22	Rep5	9	0.2
Ofav	2017	Of-8-13-17-comp	2017-08-22	Rep6	9	0.65
Ofav	2017	Of-8-13-17-comp	2017-08-22	Rep7	9	0.2
Ofav	2017	Of-8-13-17-comp	2017-08-22	Rep8	9	0.25
Ofav	2017	Of-8-13-17-comp	2017-08-22	Rep9	9	0.45
Ofav	2013	Of-8-26-13-compA	2013-09-05	Rep1	10	0.6
Ofav	2013	Of-8-26-13-compA	2013-09-05	Rep10	10	0.3
Ofav	2013	Of-8-26-13-compA	2013-09-05	Rep11	10	0
Ofav	2013	Of-8-26-13-compA	2013-09-05	Rep12	10	0
Ofav	2013	Of-8-26-13-compA	2013-09-05	Rep2	10	0.25
Ofav	2013	Of-8-26-13-compA	2013-09-05	Rep3	10	0.1
Ofav	2013	Of-8-26-13-compA	2013-09-05	Rep4	10	0.2
Ofav	2013	Of-8-26-13-compA	2013-09-05	Rep5	10	0.35
Ofav	2013	Of-8-26-13-compA	2013-09-05	Rep6	10	0
Ofav	2013	Of-8-26-13-compA	2013-09-05	Rep7	10	0
Ofav	2013	Of-8-26-13-compA	2013-09-05	Rep8	10	0
Ofav	2013	Of-8-26-13-compA	2013-09-05	Rep9	10	0
Ofav	2013	Of-8-27-13-compB	2013-09-06	Rep1	10	0
Ofav	2013	Of-8-27-13-compB	2013-09-06	Rep10	10	0
Ofav	2013	Of-8-27-13-compB	2013-09-06	Rep11	10	0
Ofav	2013	Of-8-27-13-compB	2013-09-06	Rep12	10	0.1
Ofav	2013	Of-8-27-13-compB	2013-09-06	Rep2	10	0
Ofav	2013	Of-8-27-13-compB	2013-09-06	Rep3	10	0
Ofav	2013	Of-8-27-13-compB	2013-09-06	Rep4	10	0.1
Ofav	2013	Of-8-27-13-compB	2013-09-06	Rep5	10	0
Ofav	2013	Of-8-27-13-compB	2013-09-06	Rep6	10	0
Ofav	2013	Of-8-27-13-compB	2013-09-06	Rep7	10	0
Ofav	2013	Of-8-27-13-compB	2013-09-06	Rep8	10	0.2
Ofav	2013	Of-8-27-13-compB	2013-09-06	Rep9	10	0.05
Ofav	2014	Of-8-17-14-comp	2014-08-27	Rep1	10	0.15
Ofav	2014	Of-8-17-14-comp	2014-08-27	Rep10	10	0.1
Ofav	2014	Of-8-17-14-comp	2014-08-27	Rep11	10	0
Ofav	2014	Of-8-17-14-comp	2014-08-27	Rep12	10	0.1
Ofav	2014	Of-8-17-14-comp	2014-08-27	Rep2	10	0.1
Ofav	2014	Of-8-17-14-comp	2014-08-27	Rep3	10	0.15
Ofav	2014	Of-8-17-14-comp	2014-08-27	Rep4	10	0.05
Ofav	2014	Of-8-17-14-comp	2014-08-27	Rep5	10	0.05
Ofav	2014	Of-8-17-14-comp	2014-08-27	Rep6	10	0.1
Ofav	2014	Of-8-17-14-comp	2014-08-27	Rep7	10	0.2
Ofav	2014	Of-8-17-14-comp	2014-08-27	Rep8	10	0.05
Ofav	2014	Of-8-17-14-comp	2014-08-27	Rep9	10	0
Ofav	2015	Of-8-6-15-comp	2015-08-17	Rep1	10	0.05
Ofav	2015	Of-8-6-15-comp	2015-08-17	Rep10	10	0.2
Ofav	2015	Of-8-6-15-comp	2015-08-17	Rep11	10	0
Ofav	2015	Of-8-6-15-comp	2015-08-17	Rep12	10	0
Ofav	2015	Of-8-6-15-comp	2015-08-17	Rep2	10	0
Ofav	2015	Of-8-6-15-comp	2015-08-17	Rep3	10	0
Ofav	2015	Of-8-6-15-comp	2015-08-17	Rep4	10	0.45
Ofav	2015	Of-8-6-15-comp	2015-08-17	Rep5	10	0.1
Ofav	2015	Of-8-6-15-comp	2015-08-17	Rep6	10	0.1
Ofav	2015	Of-8-6-15-comp	2015-08-17	Rep7	10	0.25
Ofav	2015	Of-8-6-15-comp	2015-08-17	Rep8	10	0
Ofav	2015	Of-8-6-15-comp	2015-08-17	Rep9	10	0.05
Ofav	2017	Of-8-13-17-comp	2017-08-23	Rep1	10	0.8
Ofav	2017	Of-8-13-17-comp	2017-08-23	Rep10	10	0.9
Ofav	2017	Of-8-13-17-comp	2017-08-23	Rep11	10	0.6
Ofav	2017	Of-8-13-17-comp	2017-08-23	Rep12	10	0.2
Ofav	2017	Of-8-13-17-comp	2017-08-23	Rep2	10	0.4
Ofav	2017	Of-8-13-17-comp	2017-08-23	Rep3	10
Ofav	2017	Of-8-13-17-comp	2017-08-23	Rep4	10	0.75
Ofav	2017	Of-8-13-17-comp	2017-08-23	Rep5	10	0.4
Ofav	2017	Of-8-13-17-comp	2017-08-23	Rep6	10	0.65
Ofav	2017	Of-8-13-17-comp	2017-08-23	Rep7	10	0.1
Ofav	2017	Of-8-13-17-comp	2017-08-23	Rep8	10	0.45
Ofav	2017	Of-8-13-17-comp	2017-08-23	Rep9	10	0.35
Ofav	2013	Of-8-26-13-compA	2013-09-06	Rep1	11	0
Ofav	2013	Of-8-26-13-compA	2013-09-06	Rep10	11	0
Ofav	2013	Of-8-26-13-compA	2013-09-06	Rep11	11	0.05
Ofav	2013	Of-8-26-13-compA	2013-09-06	Rep12	11	0.65
Ofav	2013	Of-8-26-13-compA	2013-09-06	Rep2	11	0.4
Ofav	2013	Of-8-26-13-compA	2013-09-06	Rep3	11	0
Ofav	2013	Of-8-26-13-compA	2013-09-06	Rep4	11	0
Ofav	2013	Of-8-26-13-compA	2013-09-06	Rep5	11	0.05
Ofav	2013	Of-8-26-13-compA	2013-09-06	Rep6	11	0.05
Ofav	2013	Of-8-26-13-compA	2013-09-06	Rep7	11	0
Ofav	2013	Of-8-26-13-compA	2013-09-06	Rep8	11	0
Ofav	2013	Of-8-26-13-compA	2013-09-06	Rep9	11	0.05
Ofav	2013	Of-8-27-13-compB	2013-09-07	Rep1	11	0
Ofav	2013	Of-8-27-13-compB	2013-09-07	Rep10	11	0
Ofav	2013	Of-8-27-13-compB	2013-09-07	Rep11	11	0
Ofav	2013	Of-8-27-13-compB	2013-09-07	Rep12	11	0.2
Ofav	2013	Of-8-27-13-compB	2013-09-07	Rep2	11	0
Ofav	2013	Of-8-27-13-compB	2013-09-07	Rep3	11	0.1
Ofav	2013	Of-8-27-13-compB	2013-09-07	Rep4	11	0
Ofav	2013	Of-8-27-13-compB	2013-09-07	Rep5	11	0
Ofav	2013	Of-8-27-13-compB	2013-09-07	Rep6	11	0
Ofav	2013	Of-8-27-13-compB	2013-09-07	Rep7	11	0
Ofav	2013	Of-8-27-13-compB	2013-09-07	Rep8	11	0
Ofav	2013	Of-8-27-13-compB	2013-09-07	Rep9	11	0.45
Ofav	2014	Of-8-17-14-comp	2014-08-28	Rep1	11	0
Ofav	2014	Of-8-17-14-comp	2014-08-28	Rep10	11	0
Ofav	2014	Of-8-17-14-comp	2014-08-28	Rep11	11	0
Ofav	2014	Of-8-17-14-comp	2014-08-28	Rep12	11	0
Ofav	2014	Of-8-17-14-comp	2014-08-28	Rep2	11	0.1
Ofav	2014	Of-8-17-14-comp	2014-08-28	Rep3	11	0.1
Ofav	2014	Of-8-17-14-comp	2014-08-28	Rep4	11	0
Ofav	2014	Of-8-17-14-comp	2014-08-28	Rep5	11	0.05
Ofav	2014	Of-8-17-14-comp	2014-08-28	Rep6	11	0
Ofav	2014	Of-8-17-14-comp	2014-08-28	Rep7	11	0
Ofav	2014	Of-8-17-14-comp	2014-08-28	Rep8	11	0.05
Ofav	2014	Of-8-17-14-comp	2014-08-28	Rep9	11	0.05
Ofav	2013	Of-8-26-13-compA	2013-09-07	Rep1	12	0.1
Ofav	2013	Of-8-26-13-compA	2013-09-07	Rep10	12	0.55
Ofav	2013	Of-8-26-13-compA	2013-09-07	Rep11	12	0.2
Ofav	2013	Of-8-26-13-compA	2013-09-07	Rep12	12	0.05
Ofav	2013	Of-8-26-13-compA	2013-09-07	Rep2	12	0.1
Ofav	2013	Of-8-26-13-compA	2013-09-07	Rep3	12	0.1
Ofav	2013	Of-8-26-13-compA	2013-09-07	Rep4	12	0
Ofav	2013	Of-8-26-13-compA	2013-09-07	Rep5	12	0.2
Ofav	2013	Of-8-26-13-compA	2013-09-07	Rep6	12	0.05
Ofav	2013	Of-8-26-13-compA	2013-09-07	Rep7	12	0.05
Ofav	2013	Of-8-26-13-compA	2013-09-07	Rep8	12	0.25
Ofav	2013	Of-8-26-13-compA	2013-09-07	Rep9	12	0
Ofav	2013	Of-8-27-13-compB	2013-09-08	Rep1	12	0.15
Ofav	2013	Of-8-27-13-compB	2013-09-08	Rep10	12	0
Ofav	2013	Of-8-27-13-compB	2013-09-08	Rep11	12	0.55
Ofav	2013	Of-8-27-13-compB	2013-09-08	Rep12	12	0.15
Ofav	2013	Of-8-27-13-compB	2013-09-08	Rep2	12	0
Ofav	2013	Of-8-27-13-compB	2013-09-08	Rep3	12	0
Ofav	2013	Of-8-27-13-compB	2013-09-08	Rep4	12	0
Ofav	2013	Of-8-27-13-compB	2013-09-08	Rep5	12	0.35
Ofav	2013	Of-8-27-13-compB	2013-09-08	Rep6	12	0
Ofav	2013	Of-8-27-13-compB	2013-09-08	Rep7	12	0
Ofav	2013	Of-8-27-13-compB	2013-09-08	Rep8	12	0.2
Ofav	2013	Of-8-27-13-compB	2013-09-08	Rep9	12	0
Ofav	2014	Of-8-17-14-comp	2014-08-29	Rep1	12	0.05
Ofav	2014	Of-8-17-14-comp	2014-08-29	Rep10	12	0
Ofav	2014	Of-8-17-14-comp	2014-08-29	Rep11	12	0.15
Ofav	2014	Of-8-17-14-comp	2014-08-29	Rep12	12	0.05
Ofav	2014	Of-8-17-14-comp	2014-08-29	Rep2	12	0
Ofav	2014	Of-8-17-14-comp	2014-08-29	Rep3	12	0.15
Ofav	2014	Of-8-17-14-comp	2014-08-29	Rep4	12	0.1
Ofav	2014	Of-8-17-14-comp	2014-08-29	Rep5	12	0
Ofav	2014	Of-8-17-14-comp	2014-08-29	Rep6	12	0.05
Ofav	2014	Of-8-17-14-comp	2014-08-29	Rep7	12	0
Ofav	2014	Of-8-17-14-comp	2014-08-29	Rep8	12	0.15
Ofav	2014	Of-8-17-14-comp	2014-08-29	Rep9	12	0.15
Ofav	2015	Of-8-6-15-comp	2015-08-19	Rep1	12	0.6
Ofav	2015	Of-8-6-15-comp	2015-08-19	Rep10	12	0.15
Ofav	2015	Of-8-6-15-comp	2015-08-19	Rep11	12	0.2
Ofav	2015	Of-8-6-15-comp	2015-08-19	Rep12	12	0.6
Ofav	2015	Of-8-6-15-comp	2015-08-19	Rep2	12	0.1
Ofav	2015	Of-8-6-15-comp	2015-08-19	Rep3	12	0.35
Ofav	2015	Of-8-6-15-comp	2015-08-19	Rep4	12	0.05
Ofav	2015	Of-8-6-15-comp	2015-08-19	Rep5	12	0.6
Ofav	2015	Of-8-6-15-comp	2015-08-19	Rep6	12	0.5
Ofav	2015	Of-8-6-15-comp	2015-08-19	Rep7	12	0.25
Ofav	2015	Of-8-6-15-comp	2015-08-19	Rep8	12	0.35
Ofav	2015	Of-8-6-15-comp	2015-08-19	Rep9	12	0.4
Ofav	2017	Of-8-13-17-comp	2017-08-25	Rep1	12	0.7
Ofav	2017	Of-8-13-17-comp	2017-08-25	Rep10	12	0.1
Ofav	2017	Of-8-13-17-comp	2017-08-25	Rep11	12	0.1
Ofav	2017	Of-8-13-17-comp	2017-08-25	Rep12	12	0.1
Ofav	2017	Of-8-13-17-comp	2017-08-25	Rep2	12	0.3
Ofav	2017	Of-8-13-17-comp	2017-08-25	Rep3	12	0.5
Ofav	2017	Of-8-13-17-comp	2017-08-25	Rep4	12	0.1
Ofav	2017	Of-8-13-17-comp	2017-08-25	Rep5	12	0.5
Ofav	2017	Of-8-13-17-comp	2017-08-25	Rep6	12	0.25
Ofav	2017	Of-8-13-17-comp	2017-08-25	Rep7	12	0.4
Ofav	2017	Of-8-13-17-comp	2017-08-25	Rep8	12	0.4
Ofav	2017	Of-8-13-17-comp	2017-08-25	Rep9	12	0.45
Ofav	2013	Of-8-26-13-compA	2013-09-08	Rep1	13	0.1
Ofav	2013	Of-8-26-13-compA	2013-09-08	Rep10	13	0.65
Ofav	2013	Of-8-26-13-compA	2013-09-08	Rep11	13	0
Ofav	2013	Of-8-26-13-compA	2013-09-08	Rep12	13	0.1
Ofav	2013	Of-8-26-13-compA	2013-09-08	Rep2	13	0
Ofav	2013	Of-8-26-13-compA	2013-09-08	Rep3	13	0.05
Ofav	2013	Of-8-26-13-compA	2013-09-08	Rep4	13	0
Ofav	2013	Of-8-26-13-compA	2013-09-08	Rep5	13	0.1
Ofav	2013	Of-8-26-13-compA	2013-09-08	Rep6	13	0
Ofav	2013	Of-8-26-13-compA	2013-09-08	Rep7	13	0.3
Ofav	2013	Of-8-26-13-compA	2013-09-08	Rep8	13	0
Ofav	2013	Of-8-26-13-compA	2013-09-08	Rep9	13	0.45
Ofav	2014	Of-8-17-14-comp	2014-08-30	Rep1	13	0.25
Ofav	2014	Of-8-17-14-comp	2014-08-30	Rep10	13	0.2
Ofav	2014	Of-8-17-14-comp	2014-08-30	Rep11	13	0.2
Ofav	2014	Of-8-17-14-comp	2014-08-30	Rep12	13	0
Ofav	2014	Of-8-17-14-comp	2014-08-30	Rep2	13	0.15
Ofav	2014	Of-8-17-14-comp	2014-08-30	Rep3	13	0
Ofav	2014	Of-8-17-14-comp	2014-08-30	Rep4	13	0
Ofav	2014	Of-8-17-14-comp	2014-08-30	Rep5	13	0.05
Ofav	2014	Of-8-17-14-comp	2014-08-30	Rep6	13	0.1
Ofav	2014	Of-8-17-14-comp	2014-08-30	Rep7	13	0.05
Ofav	2014	Of-8-17-14-comp	2014-08-30	Rep8	13	0.05
Ofav	2014	Of-8-17-14-comp	2014-08-30	Rep9	13	0.05
Ofav	2017	Of-8-13-17-comp	2017-08-26	Rep1	13	0.35
Ofav	2017	Of-8-13-17-comp	2017-08-26	Rep10	13	0.45
Ofav	2017	Of-8-13-17-comp	2017-08-26	Rep11	13	0.2
Ofav	2017	Of-8-13-17-comp	2017-08-26	Rep12	13	0.25
Ofav	2017	Of-8-13-17-comp	2017-08-26	Rep2	13	0.55
Ofav	2017	Of-8-13-17-comp	2017-08-26	Rep3	13	0.45
Ofav	2017	Of-8-13-17-comp	2017-08-26	Rep4	13	0.4
Ofav	2017	Of-8-13-17-comp	2017-08-26	Rep5	13	0.7
Ofav	2017	Of-8-13-17-comp	2017-08-26	Rep6	13	0.2
Ofav	2017	Of-8-13-17-comp	2017-08-26	Rep7	13	0.1
Ofav	2017	Of-8-13-17-comp	2017-08-26	Rep8	13	0.4
Ofav	2017	Of-8-13-17-comp	2017-08-26	Rep9	13	0.35
Ofav	2012	Of-9-7-12-comp	2012-09-21	Rep1	14	0
Ofav	2012	Of-9-7-12-comp	2012-09-21	Rep10	14	0
Ofav	2012	Of-9-7-12-comp	2012-09-21	Rep11	14	0
Ofav	2012	Of-9-7-12-comp	2012-09-21	Rep12	14	0
Ofav	2012	Of-9-7-12-comp	2012-09-21	Rep2	14	0.4
Ofav	2012	Of-9-7-12-comp	2012-09-21	Rep3	14	0.1
Ofav	2012	Of-9-7-12-comp	2012-09-21	Rep4	14	0.05
Ofav	2012	Of-9-7-12-comp	2012-09-21	Rep5	14	0
Ofav	2012	Of-9-7-12-comp	2012-09-21	Rep6	14	0
Ofav	2012	Of-9-7-12-comp	2012-09-21	Rep7	14	0.1
Ofav	2012	Of-9-7-12-comp	2012-09-21	Rep8	14	0
Ofav	2012	Of-9-7-12-comp	2012-09-21	Rep9	14	0.2
Ofav	2013	Of-8-27-13-compB	2013-09-10	Rep1	14	0.2
Ofav	2013	Of-8-27-13-compB	2013-09-10	Rep10	14	0.05
Ofav	2013	Of-8-27-13-compB	2013-09-10	Rep11	14	0
Ofav	2013	Of-8-27-13-compB	2013-09-10	Rep12	14	0.05
Ofav	2013	Of-8-27-13-compB	2013-09-10	Rep2	14	0.1
Ofav	2013	Of-8-27-13-compB	2013-09-10	Rep3	14	0
Ofav	2013	Of-8-27-13-compB	2013-09-10	Rep4	14	0.1
Ofav	2013	Of-8-27-13-compB	2013-09-10	Rep5	14	0
Ofav	2013	Of-8-27-13-compB	2013-09-10	Rep6	14	0
Ofav	2013	Of-8-27-13-compB	2013-09-10	Rep7	14	0
Ofav	2013	Of-8-27-13-compB	2013-09-10	Rep8	14	0.05
Ofav	2013	Of-8-27-13-compB	2013-09-10	Rep9	14	0
Ofav	2015	Of-8-6-15-comp	2015-08-21	Rep1	14	0.15
Ofav	2015	Of-8-6-15-comp	2015-08-21	Rep10	14	0.1
Ofav	2015	Of-8-6-15-comp	2015-08-21	Rep11	14	0.1
Ofav	2015	Of-8-6-15-comp	2015-08-21	Rep12	14	0.1
Ofav	2015	Of-8-6-15-comp	2015-08-21	Rep2	14	0.05
Ofav	2015	Of-8-6-15-comp	2015-08-21	Rep3	14	0.05
Ofav	2015	Of-8-6-15-comp	2015-08-21	Rep4	14	0.15
Ofav	2015	Of-8-6-15-comp	2015-08-21	Rep5	14	0.1
Ofav	2015	Of-8-6-15-comp	2015-08-21	Rep6	14	0.05
Ofav	2015	Of-8-6-15-comp	2015-08-21	Rep7	14	0.1
Ofav	2015	Of-8-6-15-comp	2015-08-21	Rep8	14	0.1
Ofav	2015	Of-8-6-15-comp	2015-08-21	Rep9	14	0.05
Ofav	2013	Of-8-26-13-compA	2013-09-10	Rep1	15	0.1
Ofav	2013	Of-8-26-13-compA	2013-09-10	Rep10	15	0.1
Ofav	2013	Of-8-26-13-compA	2013-09-10	Rep11	15	0.05
Ofav	2013	Of-8-26-13-compA	2013-09-10	Rep12	15	0.05
Ofav	2013	Of-8-26-13-compA	2013-09-10	Rep2	15	0.3
Ofav	2013	Of-8-26-13-compA	2013-09-10	Rep3	15	0.05
Ofav	2013	Of-8-26-13-compA	2013-09-10	Rep4	15	0.2
Ofav	2013	Of-8-26-13-compA	2013-09-10	Rep5	15	0.15
Ofav	2013	Of-8-26-13-compA	2013-09-10	Rep6	15	0.05
Ofav	2013	Of-8-26-13-compA	2013-09-10	Rep7	15	0.1
Ofav	2013	Of-8-26-13-compA	2013-09-10	Rep8	15	0.25
Ofav	2013	Of-8-26-13-compA	2013-09-10	Rep9	15	0
Ofav	2017	Of-8-13-17-comp	2017-08-28	Rep1	15	0.1
Ofav	2017	Of-8-13-17-comp	2017-08-28	Rep10	15	0.1
Ofav	2017	Of-8-13-17-comp	2017-08-28	Rep11	15	0.15
Ofav	2017	Of-8-13-17-comp	2017-08-28	Rep12	15	0.05
Ofav	2017	Of-8-13-17-comp	2017-08-28	Rep2	15	0.25
Ofav	2017	Of-8-13-17-comp	2017-08-28	Rep3	15	0.1
Ofav	2017	Of-8-13-17-comp	2017-08-28	Rep4	15	0.3
Ofav	2017	Of-8-13-17-comp	2017-08-28	Rep5	15	0
Ofav	2017	Of-8-13-17-comp	2017-08-28	Rep6	15	0.15
Ofav	2017	Of-8-13-17-comp	2017-08-28	Rep7	15	0.35
Ofav	2017	Of-8-13-17-comp	2017-08-28	Rep8	15	0.45
Ofav	2017	Of-8-13-17-comp	2017-08-28	Rep9	15	0.45
Ofav	2013	Of-8-27-13-compB	2013-09-12	Rep1	16	0.15
Ofav	2013	Of-8-27-13-compB	2013-09-12	Rep10	16	0.1
Ofav	2013	Of-8-27-13-compB	2013-09-12	Rep11	16	0.25
Ofav	2013	Of-8-27-13-compB	2013-09-12	Rep12	16	0.25
Ofav	2013	Of-8-27-13-compB	2013-09-12	Rep2	16	0.2
Ofav	2013	Of-8-27-13-compB	2013-09-12	Rep3	16	0.05
Ofav	2013	Of-8-27-13-compB	2013-09-12	Rep4	16	0.1
Ofav	2013	Of-8-27-13-compB	2013-09-12	Rep5	16	0.1
Ofav	2013	Of-8-27-13-compB	2013-09-12	Rep6	16	0.05
Ofav	2013	Of-8-27-13-compB	2013-09-12	Rep7	16	0.1
Ofav	2013	Of-8-27-13-compB	2013-09-12	Rep8	16	0.8
Ofav	2013	Of-8-27-13-compB	2013-09-12	Rep9	16	0
Ofav	2014	Of-8-17-14-comp	2014-09-02	Rep1	16	0.1
Ofav	2014	Of-8-17-14-comp	2014-09-02	Rep10	16	0.2
Ofav	2014	Of-8-17-14-comp	2014-09-02	Rep11	16	0
Ofav	2014	Of-8-17-14-comp	2014-09-02	Rep12	16	0.15
Ofav	2014	Of-8-17-14-comp	2014-09-02	Rep2	16	0.05
Ofav	2014	Of-8-17-14-comp	2014-09-02	Rep3	16	0.1
Ofav	2014	Of-8-17-14-comp	2014-09-02	Rep4	16	0
Ofav	2014	Of-8-17-14-comp	2014-09-02	Rep5	16	0
Ofav	2014	Of-8-17-14-comp	2014-09-02	Rep6	16	0.05
Ofav	2014	Of-8-17-14-comp	2014-09-02	Rep7	16	0.05
Ofav	2014	Of-8-17-14-comp	2014-09-02	Rep8	16	0.15
Ofav	2014	Of-8-17-14-comp	2014-09-02	Rep9	16	0
Ofav	2015	Of-8-6-15-comp	2015-08-23	Rep1	16	0
Ofav	2015	Of-8-6-15-comp	2015-08-23	Rep2	16	0.2
Ofav	2015	Of-8-6-15-comp	2015-08-23	Rep3	16	0.15
Ofav	2015	Of-8-6-15-comp	2015-08-23	Rep4	16	0.15
Ofav	2015	Of-8-6-15-comp	2015-08-23	Rep5	16	0.05
Ofav	2015	Of-8-6-15-comp	2015-08-23	Rep6	16	0.2
Ofav	2015	Of-8-6-15-comp	2015-08-23	Rep7	16	0.05
Ofav	2015	Of-8-6-15-comp	2015-08-23	Rep8	16	0.1
Ofav	2015	Of-8-6-15-comp	2015-08-23	Rep9	16	0.15
Ofav	2013	Of-8-26-13-compA	2013-09-12	Rep1	17	0
Ofav	2013	Of-8-26-13-compA	2013-09-12	Rep10	17	0
Ofav	2013	Of-8-26-13-compA	2013-09-12	Rep11	17	0.05
Ofav	2013	Of-8-26-13-compA	2013-09-12	Rep12	17	0
Ofav	2013	Of-8-26-13-compA	2013-09-12	Rep2	17	0.45
Ofav	2013	Of-8-26-13-compA	2013-09-12	Rep3	17	0
Ofav	2013	Of-8-26-13-compA	2013-09-12	Rep4	17	0.15
Ofav	2013	Of-8-26-13-compA	2013-09-12	Rep5	17	0.05
Ofav	2013	Of-8-26-13-compA	2013-09-12	Rep6	17	0.55
Ofav	2013	Of-8-26-13-compA	2013-09-12	Rep7	17	0.05
Ofav	2013	Of-8-26-13-compA	2013-09-12	Rep8	17	0.15
Ofav	2013	Of-8-26-13-compA	2013-09-12	Rep9	17	0
Ofav	2017	Of-8-13-17-comp	2017-08-30	Rep1	17	0.3
Ofav	2017	Of-8-13-17-comp	2017-08-30	Rep10	17	0.35
Ofav	2017	Of-8-13-17-comp	2017-08-30	Rep11	17	0.1
Ofav	2017	Of-8-13-17-comp	2017-08-30	Rep12	17	0
Ofav	2017	Of-8-13-17-comp	2017-08-30	Rep2	17	0.5
Ofav	2017	Of-8-13-17-comp	2017-08-30	Rep3	17	0.25
Ofav	2017	Of-8-13-17-comp	2017-08-30	Rep4	17	0
Ofav	2017	Of-8-13-17-comp	2017-08-30	Rep5	17	0.3
Ofav	2017	Of-8-13-17-comp	2017-08-30	Rep6	17	0.2
Ofav	2017	Of-8-13-17-comp	2017-08-30	Rep7	17	0.25
Ofav	2017	Of-8-13-17-comp	2017-08-30	Rep8	17	0.05
Ofav	2017	Of-8-13-17-comp	2017-08-30	Rep9	17	0.5
Ofav	2013	Of-8-27-13-compB	2013-09-14	Rep1	18	0
Ofav	2013	Of-8-27-13-compB	2013-09-14	Rep10	18	0
Ofav	2013	Of-8-27-13-compB	2013-09-14	Rep11	18	0
Ofav	2013	Of-8-27-13-compB	2013-09-14	Rep12	18	0
Ofav	2013	Of-8-27-13-compB	2013-09-14	Rep2	18	0.65
Ofav	2013	Of-8-27-13-compB	2013-09-14	Rep3	18	0.4
Ofav	2013	Of-8-27-13-compB	2013-09-14	Rep4	18	0
Ofav	2013	Of-8-27-13-compB	2013-09-14	Rep5	18	0.05
Ofav	2013	Of-8-27-13-compB	2013-09-14	Rep6	18	0
Ofav	2013	Of-8-27-13-compB	2013-09-14	Rep7	18	0
Ofav	2013	Of-8-27-13-compB	2013-09-14	Rep8	18	0.15
Ofav	2013	Of-8-27-13-compB	2013-09-14	Rep9	18	0.05
Ofav	2014	Of-8-17-14-comp	2014-09-04	Rep1	18	0.05
Ofav	2014	Of-8-17-14-comp	2014-09-04	Rep10	18	0.05
Ofav	2014	Of-8-17-14-comp	2014-09-04	Rep11	18	0.2
Ofav	2014	Of-8-17-14-comp	2014-09-04	Rep12	18	0
Ofav	2014	Of-8-17-14-comp	2014-09-04	Rep2	18	0
Ofav	2014	Of-8-17-14-comp	2014-09-04	Rep3	18	0.1
Ofav	2014	Of-8-17-14-comp	2014-09-04	Rep4	18	0.05
Ofav	2014	Of-8-17-14-comp	2014-09-04	Rep5	18	0.05
Ofav	2014	Of-8-17-14-comp	2014-09-04	Rep6	18	0.1
Ofav	2014	Of-8-17-14-comp	2014-09-04	Rep7	18	0
Ofav	2014	Of-8-17-14-comp	2014-09-04	Rep8	18	0.15
Ofav	2014	Of-8-17-14-comp	2014-09-04	Rep9	18	0.15
Ofav	2015	Of-8-6-15-comp	2015-08-25	Rep1	18	0.1
Ofav	2015	Of-8-6-15-comp	2015-08-25	Rep2	18	0.05
Ofav	2015	Of-8-6-15-comp	2015-08-25	Rep3	18	0
Ofav	2015	Of-8-6-15-comp	2015-08-25	Rep4	18	0.1
Ofav	2015	Of-8-6-15-comp	2015-08-25	Rep5	18	0.1
Ofav	2015	Of-8-6-15-comp	2015-08-25	Rep6	18	0
Ofav	2015	Of-8-6-15-comp	2015-08-25	Rep7	18	0.05
Ofav	2015	Of-8-6-15-comp	2015-08-25	Rep8	18	0.05
Ofav	2015	Of-8-6-15-comp	2015-08-25	Rep9	18	0.05
Ofav	2013	Of-8-26-13-compA	2013-09-14	Rep1	19	0
Ofav	2013	Of-8-26-13-compA	2013-09-14	Rep10	19	0
Ofav	2013	Of-8-26-13-compA	2013-09-14	Rep11	19	0.35
Ofav	2013	Of-8-26-13-compA	2013-09-14	Rep12	19	0.2
Ofav	2013	Of-8-26-13-compA	2013-09-14	Rep2	19	0
Ofav	2013	Of-8-26-13-compA	2013-09-14	Rep3	19	0.4
Ofav	2013	Of-8-26-13-compA	2013-09-14	Rep4	19	0.1
Ofav	2013	Of-8-26-13-compA	2013-09-14	Rep5	19	0.05
Ofav	2013	Of-8-26-13-compA	2013-09-14	Rep6	19	0.8
Ofav	2013	Of-8-26-13-compA	2013-09-14	Rep7	19	0.4
Ofav	2013	Of-8-26-13-compA	2013-09-14	Rep8	19	0.35
Ofav	2013	Of-8-26-13-compA	2013-09-14	Rep9	19	0.05
Ofav	2017	Of-8-13-17-comp	2017-09-01	Rep1	19	0.1
Ofav	2017	Of-8-13-17-comp	2017-09-01	Rep10	19	0
Ofav	2017	Of-8-13-17-comp	2017-09-01	Rep11	19	0.05
Ofav	2017	Of-8-13-17-comp	2017-09-01	Rep12	19	0
Ofav	2017	Of-8-13-17-comp	2017-09-01	Rep2	19	0
Ofav	2017	Of-8-13-17-comp	2017-09-01	Rep3	19	0
Ofav	2017	Of-8-13-17-comp	2017-09-01	Rep4	19	0.25
Ofav	2017	Of-8-13-17-comp	2017-09-01	Rep5	19	0.25
Ofav	2017	Of-8-13-17-comp	2017-09-01	Rep6	19	0.15
Ofav	2017	Of-8-13-17-comp	2017-09-01	Rep7	19	0.15
Ofav	2017	Of-8-13-17-comp	2017-09-01	Rep8	19	0.1
Ofav	2017	Of-8-13-17-comp	2017-09-01	Rep9	19	0
Ofav	2013	Of-8-27-13-compB	2013-09-16	Rep1	20	0.15
Ofav	2013	Of-8-27-13-compB	2013-09-16	Rep10	20	0.2
Ofav	2013	Of-8-27-13-compB	2013-09-16	Rep11	20	0.1
Ofav	2013	Of-8-27-13-compB	2013-09-16	Rep12	20	0.15
Ofav	2013	Of-8-27-13-compB	2013-09-16	Rep2	20	0.25
Ofav	2013	Of-8-27-13-compB	2013-09-16	Rep3	20	0.2
Ofav	2013	Of-8-27-13-compB	2013-09-16	Rep4	20	0.1
Ofav	2013	Of-8-27-13-compB	2013-09-16	Rep5	20	0.5
Ofav	2013	Of-8-27-13-compB	2013-09-16	Rep6	20	0.25
Ofav	2013	Of-8-27-13-compB	2013-09-16	Rep7	20	0.5
Ofav	2013	Of-8-27-13-compB	2013-09-16	Rep8	20	0.45
Ofav	2013	Of-8-27-13-compB	2013-09-16	Rep9	20	0.25
Ofav	2014	Of-8-17-14-comp	2014-09-06	Rep1	20	0.2
Ofav	2014	Of-8-17-14-comp	2014-09-06	Rep10	20	0.05
Ofav	2014	Of-8-17-14-comp	2014-09-06	Rep11	20	0.15
Ofav	2014	Of-8-17-14-comp	2014-09-06	Rep12	20	0.3
Ofav	2014	Of-8-17-14-comp	2014-09-06	Rep2	20	0.15
Ofav	2014	Of-8-17-14-comp	2014-09-06	Rep3	20	0.05
Ofav	2014	Of-8-17-14-comp	2014-09-06	Rep4	20	0.25
Ofav	2014	Of-8-17-14-comp	2014-09-06	Rep5	20	0.6
Ofav	2014	Of-8-17-14-comp	2014-09-06	Rep6	20	0.35
Ofav	2014	Of-8-17-14-comp	2014-09-06	Rep7	20	0.05
Ofav	2014	Of-8-17-14-comp	2014-09-06	Rep8	20	0.3
Ofav	2014	Of-8-17-14-comp	2014-09-06	Rep9	20	0.15
Ofav	2013	Of-8-26-13-compA	2013-09-16	Rep1	21	0.7
Ofav	2013	Of-8-26-13-compA	2013-09-16	Rep10	21	0.65
Ofav	2013	Of-8-26-13-compA	2013-09-16	Rep11	21	0.55
Ofav	2013	Of-8-26-13-compA	2013-09-16	Rep12	21	0.3
Ofav	2013	Of-8-26-13-compA	2013-09-16	Rep2	21	0.4
Ofav	2013	Of-8-26-13-compA	2013-09-16	Rep3	21	0.4
Ofav	2013	Of-8-26-13-compA	2013-09-16	Rep4	21	0.5
Ofav	2013	Of-8-26-13-compA	2013-09-16	Rep5	21	0.35
Ofav	2013	Of-8-26-13-compA	2013-09-16	Rep6	21	0.35
Ofav	2013	Of-8-26-13-compA	2013-09-16	Rep7	21	0.3
Ofav	2013	Of-8-26-13-compA	2013-09-16	Rep8	21	0.4
Ofav	2013	Of-8-26-13-compA	2013-09-16	Rep9	21	0.15
Ofav	2017	Of-8-13-17-comp	2017-09-03	Rep1	21	0.05
Ofav	2017	Of-8-13-17-comp	2017-09-03	Rep10	21	0.05
Ofav	2017	Of-8-13-17-comp	2017-09-03	Rep11	21	0.2
Ofav	2017	Of-8-13-17-comp	2017-09-03	Rep12	21	0.15
Ofav	2017	Of-8-13-17-comp	2017-09-03	Rep2	21	0
Ofav	2017	Of-8-13-17-comp	2017-09-03	Rep3	21	0.25
Ofav	2017	Of-8-13-17-comp	2017-09-03	Rep4	21	0.05
Ofav	2017	Of-8-13-17-comp	2017-09-03	Rep5	21	0.25
Ofav	2017	Of-8-13-17-comp	2017-09-03	Rep6	21	0.1
Ofav	2017	Of-8-13-17-comp	2017-09-03	Rep7	21	0.05
Ofav	2017	Of-8-13-17-comp	2017-09-03	Rep8	21	0.1
Ofav	2017	Of-8-13-17-comp	2017-09-03	Rep9	21	0.25
Ofav	2014	Of-8-17-14-comp	2014-09-08	Rep1	22	0
Ofav	2014	Of-8-17-14-comp	2014-09-08	Rep10	22	0.1
Ofav	2014	Of-8-17-14-comp	2014-09-08	Rep11	22	0.05
Ofav	2014	Of-8-17-14-comp	2014-09-08	Rep12	22	0
Ofav	2014	Of-8-17-14-comp	2014-09-08	Rep2	22	0.1
Ofav	2014	Of-8-17-14-comp	2014-09-08	Rep3	22	0.05
Ofav	2014	Of-8-17-14-comp	2014-09-08	Rep4	22	0.1
Ofav	2014	Of-8-17-14-comp	2014-09-08	Rep5	22	0.1
Ofav	2014	Of-8-17-14-comp	2014-09-08	Rep6	22	0.4
Ofav	2014	Of-8-17-14-comp	2014-09-08	Rep7	22	0.25
Ofav	2014	Of-8-17-14-comp	2014-09-08	Rep8	22	0.15
Ofav	2014	Of-8-17-14-comp	2014-09-08	Rep9	22	0.1
Ofav	2013	Of-8-27-13-compB	2013-09-19	Rep1	23	0.05
Ofav	2013	Of-8-27-13-compB	2013-09-19	Rep10	23	0.05
Ofav	2013	Of-8-27-13-compB	2013-09-19	Rep11	23	0
Ofav	2013	Of-8-27-13-compB	2013-09-19	Rep12	23	0
Ofav	2013	Of-8-27-13-compB	2013-09-19	Rep2	23	0.45
Ofav	2013	Of-8-27-13-compB	2013-09-19	Rep3	23	0
Ofav	2013	Of-8-27-13-compB	2013-09-19	Rep4	23	0.05
Ofav	2013	Of-8-27-13-compB	2013-09-19	Rep5	23	0
Ofav	2013	Of-8-27-13-compB	2013-09-19	Rep6	23	0.15
Ofav	2013	Of-8-27-13-compB	2013-09-19	Rep7	23	0.3
Ofav	2013	Of-8-27-13-compB	2013-09-19	Rep8	23	0
Ofav	2013	Of-8-27-13-compB	2013-09-19	Rep9	23	0
Ofav	2017	Of-8-13-17-comp	2017-09-05	Rep1	23	0.3
Ofav	2017	Of-8-13-17-comp	2017-09-05	Rep10	23	0.1
Ofav	2017	Of-8-13-17-comp	2017-09-05	Rep11	23	0.1
Ofav	2017	Of-8-13-17-comp	2017-09-05	Rep12	23	0.1
Ofav	2017	Of-8-13-17-comp	2017-09-05	Rep2	23	0.05
Ofav	2017	Of-8-13-17-comp	2017-09-05	Rep3	23	0.3
Ofav	2017	Of-8-13-17-comp	2017-09-05	Rep4	23	0.1
Ofav	2017	Of-8-13-17-comp	2017-09-05	Rep5	23	0.05
Ofav	2017	Of-8-13-17-comp	2017-09-05	Rep6	23	0.05
Ofav	2017	Of-8-13-17-comp	2017-09-05	Rep7	23	0
Ofav	2017	Of-8-13-17-comp	2017-09-05	Rep8	23	0.15
Ofav	2017	Of-8-13-17-comp	2017-09-05	Rep9	23	0.05
Ofav	2013	Of-8-26-13-compA	2013-09-19	Rep1	24	0.6
Ofav	2013	Of-8-26-13-compA	2013-09-19	Rep10	24	0
Ofav	2013	Of-8-26-13-compA	2013-09-19	Rep11	24	0
Ofav	2013	Of-8-26-13-compA	2013-09-19	Rep12	24	0.1
Ofav	2013	Of-8-26-13-compA	2013-09-19	Rep2	24	0.05
Ofav	2013	Of-8-26-13-compA	2013-09-19	Rep3	24	0.3
Ofav	2013	Of-8-26-13-compA	2013-09-19	Rep4	24	0
Ofav	2013	Of-8-26-13-compA	2013-09-19	Rep5	24	0.05
Ofav	2013	Of-8-26-13-compA	2013-09-19	Rep6	24	0.2
Ofav	2013	Of-8-26-13-compA	2013-09-19	Rep7	24	0.05
Ofav	2013	Of-8-26-13-compA	2013-09-19	Rep8	24	0.45
Ofav	2013	Of-8-26-13-compA	2013-09-19	Rep9	24	0
Ofav	2014	Of-8-17-14-comp	2014-09-10	Rep1	24	0.05
Ofav	2014	Of-8-17-14-comp	2014-09-10	Rep10	24	0.05
Ofav	2014	Of-8-17-14-comp	2014-09-10	Rep11	24	0
Ofav	2014	Of-8-17-14-comp	2014-09-10	Rep12	24	0.15
Ofav	2014	Of-8-17-14-comp	2014-09-10	Rep2	24	0.15
Ofav	2014	Of-8-17-14-comp	2014-09-10	Rep3	24	0.05
Ofav	2014	Of-8-17-14-comp	2014-09-10	Rep4	24	0.05
Ofav	2014	Of-8-17-14-comp	2014-09-10	Rep5	24	0.15
Ofav	2014	Of-8-17-14-comp	2014-09-10	Rep6	24	0.05
Ofav	2014	Of-8-17-14-comp	2014-09-10	Rep7	24	0
Ofav	2014	Of-8-17-14-comp	2014-09-10	Rep8	24	0.05
Ofav	2014	Of-8-17-14-comp	2014-09-10	Rep9	24	0
Ofav	2017	Of-8-13-17-comp	2017-09-06	Rep1	24	0.05
Ofav	2017	Of-8-13-17-comp	2017-09-06	Rep10	24	0.25
Ofav	2017	Of-8-13-17-comp	2017-09-06	10W	24	0.15
Ofav	2017	Of-8-13-17-comp	2017-09-06	Rep11	24	0
Ofav	2017	Of-8-13-17-comp	2017-09-06	11W	24	0.1
Ofav	2017	Of-8-13-17-comp	2017-09-06	Rep12	24	0.5
Ofav	2017	Of-8-13-17-comp	2017-09-06	12W	24	0.2
Ofav	2017	Of-8-13-17-comp	2017-09-06	1W	24	0.15
Ofav	2017	Of-8-13-17-comp	2017-09-06	Rep2	24	0.05
Ofav	2017	Of-8-13-17-comp	2017-09-06	2W	24	0.2
Ofav	2017	Of-8-13-17-comp	2017-09-06	Rep3	24	0.1
Ofav	2017	Of-8-13-17-comp	2017-09-06	3W	24	0.1
Ofav	2017	Of-8-13-17-comp	2017-09-06	Rep4	24	0
Ofav	2017	Of-8-13-17-comp	2017-09-06	4W	24	0
Ofav	2017	Of-8-13-17-comp	2017-09-06	Rep5	24	0.05
Ofav	2017	Of-8-13-17-comp	2017-09-06	5W	24	0
Ofav	2017	Of-8-13-17-comp	2017-09-06	Rep6	24	0.05
Ofav	2017	Of-8-13-17-comp	2017-09-06	6W	24	0.1
Ofav	2017	Of-8-13-17-comp	2017-09-06	Rep7	24	0.2
Ofav	2017	Of-8-13-17-comp	2017-09-06	7W	24	0
Ofav	2017	Of-8-13-17-comp	2017-09-06	Rep8	24	0.15
Ofav	2017	Of-8-13-17-comp	2017-09-06	8W	24	0.05
Ofav	2017	Of-8-13-17-comp	2017-09-06	Rep9	24	0.35
Ofav	2017	Of-8-13-17-comp	2017-09-06	9W	24	0
Ofav	2013	Of-8-27-13-compB	2013-09-22	Rep1	26	0
Ofav	2013	Of-8-27-13-compB	2013-09-22	Rep10	26	0.15
Ofav	2013	Of-8-27-13-compB	2013-09-22	Rep11	26	0
Ofav	2013	Of-8-27-13-compB	2013-09-22	Rep12	26	0.6
Ofav	2013	Of-8-27-13-compB	2013-09-22	Rep2	26	0
Ofav	2013	Of-8-27-13-compB	2013-09-22	Rep3	26	0.15
Ofav	2013	Of-8-27-13-compB	2013-09-22	Rep4	26	0.1
Ofav	2013	Of-8-27-13-compB	2013-09-22	Rep5	26	0
Ofav	2013	Of-8-27-13-compB	2013-09-22	Rep6	26	0
Ofav	2013	Of-8-27-13-compB	2013-09-22	Rep7	26	0.7
Ofav	2013	Of-8-27-13-compB	2013-09-22	Rep8	26	0.1
Ofav	2013	Of-8-27-13-compB	2013-09-22	Rep9	26	0
Ofav	2014	Of-8-17-14-comp	2014-09-12	Rep1	26	0.05
Ofav	2014	Of-8-17-14-comp	2014-09-12	Rep10	26	0.15
Ofav	2014	Of-8-17-14-comp	2014-09-12	Rep11	26	0
Ofav	2014	Of-8-17-14-comp	2014-09-12	Rep12	26	0.1
Ofav	2014	Of-8-17-14-comp	2014-09-12	Rep2	26	0.1
Ofav	2014	Of-8-17-14-comp	2014-09-12	Rep3	26	0.1
Ofav	2014	Of-8-17-14-comp	2014-09-12	Rep4	26	0.15
Ofav	2014	Of-8-17-14-comp	2014-09-12	Rep5	26	0.3
Ofav	2014	Of-8-17-14-comp	2014-09-12	Rep6	26	0.1
Ofav	2014	Of-8-17-14-comp	2014-09-12	Rep7	26	0.1
Ofav	2014	Of-8-17-14-comp	2014-09-12	Rep8	26	0.05
Ofav	2014	Of-8-17-14-comp	2014-09-12	Rep9	26	0.15
Ofav	2012	Of-9-7-12-comp	2012-10-04	Rep1	27	0.2
Ofav	2012	Of-9-7-12-comp	2012-10-04	Rep10	27	0.25
Ofav	2012	Of-9-7-12-comp	2012-10-04	Rep11	27	0.55
Ofav	2012	Of-9-7-12-comp	2012-10-04	Rep12	27	0.6
Ofav	2012	Of-9-7-12-comp	2012-10-04	Rep2	27	0.15
Ofav	2012	Of-9-7-12-comp	2012-10-04	Rep3	27	0.05
Ofav	2012	Of-9-7-12-comp	2012-10-04	Rep4	27	0.25
Ofav	2012	Of-9-7-12-comp	2012-10-04	Rep5	27	0.1
Ofav	2012	Of-9-7-12-comp	2012-10-04	Rep6	27	0.2
Ofav	2012	Of-9-7-12-comp	2012-10-04	Rep7	27	0.55
Ofav	2012	Of-9-7-12-comp	2012-10-04	Rep8	27	0.55
Ofav	2012	Of-9-7-12-comp	2012-10-04	Rep9	27	0.25
Ofav	2013	Of-8-26-13-compA	2013-09-22	Rep1	27	0.5
Ofav	2013	Of-8-26-13-compA	2013-09-22	Rep10	27	0.45
Ofav	2013	Of-8-26-13-compA	2013-09-22	Rep11	27	0.1
Ofav	2013	Of-8-26-13-compA	2013-09-22	Rep12	27	0.6
Ofav	2013	Of-8-26-13-compA	2013-09-22	Rep2	27	0.5
Ofav	2013	Of-8-26-13-compA	2013-09-22	Rep3	27	0.75
Ofav	2013	Of-8-26-13-compA	2013-09-22	Rep4	27	0.25
Ofav	2013	Of-8-26-13-compA	2013-09-22	Rep5	27	0.5
Ofav	2013	Of-8-26-13-compA	2013-09-22	Rep6	27	0.3
Ofav	2013	Of-8-26-13-compA	2013-09-22	Rep7	27	0.3
Ofav	2013	Of-8-26-13-compA	2013-09-22	Rep8	27	0.15
Ofav	2013	Of-8-26-13-compA	2013-09-22	Rep9	27	0.05
Ofav	2014	Of-8-17-14-comp	2014-09-14	Rep1	28	0.05
Ofav	2014	Of-8-17-14-comp	2014-09-14	Rep10	28	0.1
Ofav	2014	Of-8-17-14-comp	2014-09-14	Rep11	28	0.1
Ofav	2014	Of-8-17-14-comp	2014-09-14	Rep12	28	0
Ofav	2014	Of-8-17-14-comp	2014-09-14	Rep2	28	0.05
Ofav	2014	Of-8-17-14-comp	2014-09-14	Rep3	28	0.1
Ofav	2014	Of-8-17-14-comp	2014-09-14	Rep4	28	0.1
Ofav	2014	Of-8-17-14-comp	2014-09-14	Rep5	28	0.05
Ofav	2014	Of-8-17-14-comp	2014-09-14	Rep6	28	0.15
Ofav	2014	Of-8-17-14-comp	2014-09-14	Rep7	28	0.05
Ofav	2014	Of-8-17-14-comp	2014-09-14	Rep8	28	0.1
Ofav	2014	Of-8-17-14-comp	2014-09-14	Rep9	28	0.05
Ofav	2013	Of-8-27-13-compB	2013-09-25	Rep1	29	0
Ofav	2013	Of-8-27-13-compB	2013-09-25	Rep10	29	0
Ofav	2013	Of-8-27-13-compB	2013-09-25	Rep11	29	0
Ofav	2013	Of-8-27-13-compB	2013-09-25	Rep12	29	0.05
Ofav	2013	Of-8-27-13-compB	2013-09-25	Rep2	29	0
Ofav	2013	Of-8-27-13-compB	2013-09-25	Rep3	29	0
Ofav	2013	Of-8-27-13-compB	2013-09-25	Rep4	29	0
Ofav	2013	Of-8-27-13-compB	2013-09-25	Rep5	29	0
Ofav	2013	Of-8-27-13-compB	2013-09-25	Rep6	29	0
Ofav	2013	Of-8-27-13-compB	2013-09-25	Rep7	29	0.1
Ofav	2013	Of-8-27-13-compB	2013-09-25	Rep8	29	0
Ofav	2013	Of-8-27-13-compB	2013-09-25	Rep9	29	0.15
Ofav	2013	Of-8-26-13-compA	2013-09-25	Rep1	30	0
Ofav	2013	Of-8-26-13-compA	2013-09-25	Rep10	30	0
Ofav	2013	Of-8-26-13-compA	2013-09-25	Rep11	30	0.25
Ofav	2013	Of-8-26-13-compA	2013-09-25	Rep12	30	0.05
Ofav	2013	Of-8-26-13-compA	2013-09-25	Rep2	30	0.3
Ofav	2013	Of-8-26-13-compA	2013-09-25	Rep3	30	0.45
Ofav	2013	Of-8-26-13-compA	2013-09-25	Rep4	30	0
Ofav	2013	Of-8-26-13-compA	2013-09-25	Rep5	30	0.5
Ofav	2013	Of-8-26-13-compA	2013-09-25	Rep6	30	0.1
Ofav	2013	Of-8-26-13-compA	2013-09-25	Rep7	30	0.1
Ofav	2013	Of-8-26-13-compA	2013-09-25	Rep8	30	0
Ofav	2013	Of-8-26-13-compA	2013-09-25	Rep9	30	0.05
Ofav	2013	Of-8-27-13-compB	2013-09-27	Rep1	31	0.1
Ofav	2013	Of-8-27-13-compB	2013-09-27	Rep10	31	0.15
Ofav	2013	Of-8-27-13-compB	2013-09-27	Rep11	31	0
Ofav	2013	Of-8-27-13-compB	2013-09-27	Rep12	31	0.05
Ofav	2013	Of-8-27-13-compB	2013-09-27	Rep2	31	0.05
Ofav	2013	Of-8-27-13-compB	2013-09-27	Rep3	31	0.3
Ofav	2013	Of-8-27-13-compB	2013-09-27	Rep4	31	0
Ofav	2013	Of-8-27-13-compB	2013-09-27	Rep5	31	0.2
Ofav	2013	Of-8-27-13-compB	2013-09-27	Rep6	31	0
Ofav	2013	Of-8-27-13-compB	2013-09-27	Rep7	31	0.15
Ofav	2013	Of-8-27-13-compB	2013-09-27	Rep8	31	0
Ofav	2013	Of-8-27-13-compB	2013-09-27	Rep9	31	0.1
Ofav	2013	Of-8-26-13-compA	2013-09-27	Rep1	32	0
Ofav	2013	Of-8-26-13-compA	2013-09-27	Rep10	32	0
Ofav	2013	Of-8-26-13-compA	2013-09-27	Rep11	32	0.05
Ofav	2013	Of-8-26-13-compA	2013-09-27	Rep12	32	0.05
Ofav	2013	Of-8-26-13-compA	2013-09-27	Rep2	32	0.05
Ofav	2013	Of-8-26-13-compA	2013-09-27	Rep3	32	0
Ofav	2013	Of-8-26-13-compA	2013-09-27	Rep4	32	0.1
Ofav	2013	Of-8-26-13-compA	2013-09-27	Rep5	32	0
Ofav	2013	Of-8-26-13-compA	2013-09-27	Rep6	32	0.05
Ofav	2013	Of-8-26-13-compA	2013-09-27	Rep7	32	0.05
Ofav	2013	Of-8-26-13-compA	2013-09-27	Rep8	32	0.05
Ofav	2013	Of-8-26-13-compA	2013-09-27	Rep9	32	0.1
Ofav	2012	Of-9-7-12-comp	2012-10-11	Rep1	34	0.25
Ofav	2012	Of-9-7-12-comp	2012-10-11	Rep10	34	0
Ofav	2012	Of-9-7-12-comp	2012-10-11	Rep11	34	0.15
Ofav	2012	Of-9-7-12-comp	2012-10-11	Rep12	34	0.4
Ofav	2012	Of-9-7-12-comp	2012-10-11	Rep2	34	0.65
Ofav	2012	Of-9-7-12-comp	2012-10-11	Rep3	34	0.15
Ofav	2012	Of-9-7-12-comp	2012-10-11	Rep4	34	0.45
Ofav	2012	Of-9-7-12-comp	2012-10-11	Rep5	34	0.5
Ofav	2012	Of-9-7-12-comp	2012-10-11	Rep6	34	0.05
Ofav	2012	Of-9-7-12-comp	2012-10-11	Rep7	34	0.3
Ofav	2012	Of-9-7-12-comp	2012-10-11	Rep8	34	0.25
Ofav	2012	Of-9-7-12-comp	2012-10-11	Rep9	34	0.25
Ofav	2013	Of-8-27-13-compB	2013-10-04	Rep1	38	0.05
Ofav	2013	Of-8-27-13-compB	2013-10-04	Rep10	38	0.1
Ofav	2013	Of-8-27-13-compB	2013-10-04	Rep11	38	0.4
Ofav	2013	Of-8-27-13-compB	2013-10-04	Rep12	38	0.5
Ofav	2013	Of-8-27-13-compB	2013-10-04	Rep2	38	0
Ofav	2013	Of-8-27-13-compB	2013-10-04	Rep3	38	0.15
Ofav	2013	Of-8-27-13-compB	2013-10-04	Rep4	38	0.1
Ofav	2013	Of-8-27-13-compB	2013-10-04	Rep5	38	0.5
Ofav	2013	Of-8-27-13-compB	2013-10-04	Rep6	38	0.15
Ofav	2013	Of-8-27-13-compB	2013-10-04	Rep7	38	0.15
Ofav	2013	Of-8-27-13-compB	2013-10-04	Rep8	38	0.1
Ofav	2013	Of-8-27-13-compB	2013-10-04	Rep9	38	0.1
Ofav	2013	Of-8-26-13-compA	2013-10-04	Rep1	39	0.1
Ofav	2013	Of-8-26-13-compA	2013-10-04	Rep2	39	0
Ofav	2013	Of-8-26-13-compA	2013-10-04	Rep3	39	0
Ofav	2013	Of-8-26-13-compA	2013-10-04	Rep4	39	0
Ofav	2013	Of-8-26-13-compA	2013-10-04	Rep5	39	0.2
Ofav	2013	Of-8-26-13-compA	2013-10-04	Rep6	39	0
Ofav	2013	Of-8-26-13-compA	2013-10-04	Rep7	39	0
Ofav	2012	Of-9-7-12-comp	2012-10-18	Rep1	41	0
Ofav	2012	Of-9-7-12-comp	2012-10-18	Rep10	41	0.05
Ofav	2012	Of-9-7-12-comp	2012-10-18	Rep11	41	0.05
Ofav	2012	Of-9-7-12-comp	2012-10-18	Rep12	41	0.15
Ofav	2012	Of-9-7-12-comp	2012-10-18	Rep2	41	0.15
Ofav	2012	Of-9-7-12-comp	2012-10-18	Rep3	41	0.25
Ofav	2012	Of-9-7-12-comp	2012-10-18	Rep4	41	0
Ofav	2012	Of-9-7-12-comp	2012-10-18	Rep5	41	0.25
Ofav	2012	Of-9-7-12-comp	2012-10-18	Rep6	41	0.15
Ofav	2012	Of-9-7-12-comp	2012-10-18	Rep7	41	0.1
Ofav	2012	Of-9-7-12-comp	2012-10-18	Rep8	41	0.25
Ofav	2012	Of-9-7-12-comp	2012-10-18	Rep9	41	0.05
Ofav	2012	Of-9-7-12-comp	2012-10-25	Rep1	48	0.1
Ofav	2012	Of-9-7-12-comp	2012-10-25	Rep10	48	0.1
Ofav	2012	Of-9-7-12-comp	2012-10-25	Rep11	48	0.45
Ofav	2012	Of-9-7-12-comp	2012-10-25	Rep12	48	0.15
Ofav	2012	Of-9-7-12-comp	2012-10-25	Rep2	48	0.3
Ofav	2012	Of-9-7-12-comp	2012-10-25	Rep3	48	0.05
Ofav	2012	Of-9-7-12-comp	2012-10-25	Rep4	48	0.2
Ofav	2012	Of-9-7-12-comp	2012-10-25	Rep5	48	0.05
Ofav	2012	Of-9-7-12-comp	2012-10-25	Rep6	48	0.3
Ofav	2012	Of-9-7-12-comp	2012-10-25	Rep7	48	0.05
Ofav	2012	Of-9-7-12-comp	2012-10-25	Rep8	48	0.35
Ofav	2012	Of-9-7-12-comp	2012-10-25	Rep9	48	0.35

## Sheet: AcropCompetency
Spp	Year	Cohort	Date	Replicate	dAS	%Settle
Apal	2014	Ap-8-15-14-comp	2014-08-19	1	4	0
Apal	2014	Ap-8-15-14-comp	2014-08-19	10	4	0
Apal	2014	Ap-8-15-14-comp	2014-08-19	11	4	0
Apal	2014	Ap-8-15-14-comp	2014-08-19	12	4	0
Apal	2014	Ap-8-15-14-comp	2014-08-19	2	4	0
Apal	2014	Ap-8-15-14-comp	2014-08-19	3	4	0.2
Apal	2014	Ap-8-15-14-comp	2014-08-19	4	4	0
Apal	2014	Ap-8-15-14-comp	2014-08-19	5	4	0
Apal	2014	Ap-8-15-14-comp	2014-08-19	6	4	0
Apal	2014	Ap-8-15-14-comp	2014-08-19	7	4	0
Apal	2014	Ap-8-15-14-comp	2014-08-19	8	4	0
Apal	2014	Ap-8-15-14-comp	2014-08-19	9	4	0
Apal	2013	Ap-8-24-13-comp	2013-08-29	1	5	0
Apal	2013	Ap-8-24-13-comp	2013-08-29	10	5	0
Apal	2013	Ap-8-24-13-comp	2013-08-29	11	5	0
Apal	2013	Ap-8-24-13-comp	2013-08-29	12	5	0
Apal	2013	Ap-8-24-13-comp	2013-08-29	2	5	0
Apal	2013	Ap-8-24-13-comp	2013-08-29	3	5	0.1
Apal	2013	Ap-8-24-13-comp	2013-08-29	4	5	0
Apal	2013	Ap-8-24-13-comp	2013-08-29	5	5	0
Apal	2013	Ap-8-24-13-comp	2013-08-29	6	5	0
Apal	2013	Ap-8-24-13-comp	2013-08-29	7	5	0
Apal	2013	Ap-8-24-13-comp	2013-08-29	8	5	0
Apal	2013	Ap-8-24-13-comp	2013-08-29	9	5	0
Apal	2014	Ap-8-15-14-comp	2014-08-20	1	5	0.1
Apal	2014	Ap-8-15-14-comp	2014-08-20	10	5	0
Apal	2014	Ap-8-15-14-comp	2014-08-20	11	5	0
Apal	2014	Ap-8-15-14-comp	2014-08-20	12	5	0
Apal	2014	Ap-8-15-14-comp	2014-08-20	2	5	0
Apal	2014	Ap-8-15-14-comp	2014-08-20	3	5	0.1
Apal	2014	Ap-8-15-14-comp	2014-08-20	4	5	0.1
Apal	2014	Ap-8-15-14-comp	2014-08-20	5	5	0
Apal	2014	Ap-8-15-14-comp	2014-08-20	6	5	0.1
Apal	2014	Ap-8-15-14-comp	2014-08-20	7	5	0
Apal	2014	Ap-8-15-14-comp	2014-08-20	8	5	0
Apal	2014	Ap-8-15-14-comp	2014-08-20	9	5	0
Apal	2016	Ap-8-21-16-comp	2016-08-26	1	5	0
Apal	2016	Ap-8-21-16-comp	2016-08-26	10	5	0
Apal	2016	Ap-8-21-16-comp	2016-08-26	11	5	0
Apal	2016	Ap-8-21-16-comp	2016-08-26	12	5	0
Apal	2016	Ap-8-21-16-comp	2016-08-26	2	5	0
Apal	2016	Ap-8-21-16-comp	2016-08-26	3	5	0
Apal	2016	Ap-8-21-16-comp	2016-08-26	4	5	0
Apal	2016	Ap-8-21-16-comp	2016-08-26	5	5	0
Apal	2016	Ap-8-21-16-comp	2016-08-26	6	5	0
Apal	2016	Ap-8-21-16-comp	2016-08-26	7	5	0
Apal	2016	Ap-8-21-16-comp	2016-08-26	8	5	0
Apal	2016	Ap-8-21-16-comp	2016-08-26	9	5	0
Acer	2017	Ac-8-10-17-comp	2017-08-15	1	5	0
Acer	2017	Ac-8-10-17-comp	2017-08-15	2	5	0
Acer	2017	Ac-8-10-17-comp	2017-08-15	3	5	0
Acer	2017	Ac-8-10-17-comp	2017-08-15	4	5	0
Acer	2017	Ac-8-10-17-comp	2017-08-15	5	5	0
Acer	2017	Ac-8-10-17-comp	2017-08-15	6	5	0
Acer	2017	Ac-8-10-17-comp	2017-08-15	7	5	0
Acer	2017	Ac-8-10-17-comp	2017-08-15	8	5	0
Acer	2017	Ac-8-10-17-comp	2017-08-15	9	5	0
Acer	2017	Ac-8-10-17-comp	2017-08-15	10	5	0
Acer	2017	Ac-8-10-17-comp	2017-08-15	11	5	0
Acer	2017	Ac-8-10-17-comp	2017-08-15	12	5	0
Apal	2013	Ap-8-24-13-comp	2013-08-30	1	6	0
Apal	2013	Ap-8-24-13-comp	2013-08-30	10	6	0
Apal	2013	Ap-8-24-13-comp	2013-08-30	11	6	0
Apal	2013	Ap-8-24-13-comp	2013-08-30	12	6	0
Apal	2013	Ap-8-24-13-comp	2013-08-30	2	6	0
Apal	2013	Ap-8-24-13-comp	2013-08-30	3	6	0
Apal	2013	Ap-8-24-13-comp	2013-08-30	4	6	0.2
Apal	2013	Ap-8-24-13-comp	2013-08-30	5	6	0
Apal	2013	Ap-8-24-13-comp	2013-08-30	6	6	0
Apal	2013	Ap-8-24-13-comp	2013-08-30	7	6	0
Apal	2013	Ap-8-24-13-comp	2013-08-30	8	6	0
Apal	2013	Ap-8-24-13-comp	2013-08-30	9	6	0
Apal	2014	Ap-8-15-14-comp	2014-08-21	1	6	0.1
Apal	2014	Ap-8-15-14-comp	2014-08-21	10	6	0
Apal	2014	Ap-8-15-14-comp	2014-08-21	11	6	0
Apal	2014	Ap-8-15-14-comp	2014-08-21	12	6	0
Apal	2014	Ap-8-15-14-comp	2014-08-21	2	6	0.2
Apal	2014	Ap-8-15-14-comp	2014-08-21	3	6	0
Apal	2014	Ap-8-15-14-comp	2014-08-21	4	6	0.1
Apal	2014	Ap-8-15-14-comp	2014-08-21	5	6	0.1
Apal	2014	Ap-8-15-14-comp	2014-08-21	6	6	0.1
Apal	2014	Ap-8-15-14-comp	2014-08-21	7	6	0
Apal	2014	Ap-8-15-14-comp	2014-08-21	8	6	0
Apal	2014	Ap-8-15-14-comp	2014-08-21	9	6	0
Apal	2016	Ap-8-21-16-comp	2016-08-27	1	6	0
Apal	2016	Ap-8-21-16-comp	2016-08-27	10	6	0
Apal	2016	Ap-8-21-16-comp	2016-08-27	11	6	0
Apal	2016	Ap-8-21-16-comp	2016-08-27	12	6	0
Apal	2016	Ap-8-21-16-comp	2016-08-27	2	6	0
Apal	2016	Ap-8-21-16-comp	2016-08-27	3	6	0
Apal	2016	Ap-8-21-16-comp	2016-08-27	4	6	0
Apal	2016	Ap-8-21-16-comp	2016-08-27	5	6	0.2
Apal	2016	Ap-8-21-16-comp	2016-08-27	6	6	0
Apal	2016	Ap-8-21-16-comp	2016-08-27	7	6	0
Apal	2016	Ap-8-21-16-comp	2016-08-27	8	6	0
Apal	2016	Ap-8-21-16-comp	2016-08-27	9	6	0
Acer	2017	Ac-8-10-17-comp	2017-08-16	1	6	0
Acer	2017	Ac-8-10-17-comp	2017-08-16	2	6	0
Acer	2017	Ac-8-10-17-comp	2017-08-16	3	6	0
Acer	2017	Ac-8-10-17-comp	2017-08-16	4	6	0
Acer	2017	Ac-8-10-17-comp	2017-08-16	5	6	0
Acer	2017	Ac-8-10-17-comp	2017-08-16	6	6	0
Acer	2017	Ac-8-10-17-comp	2017-08-16	7	6	0
Acer	2017	Ac-8-10-17-comp	2017-08-16	8	6	0
Acer	2017	Ac-8-10-17-comp	2017-08-16	9	6	0
Acer	2017	Ac-8-10-17-comp	2017-08-16	10	6	0
Acer	2017	Ac-8-10-17-comp	2017-08-16	11	6	0
Acer	2017	Ac-8-10-17-comp	2017-08-16	12	6	0
Apal	2013	Ap-8-24-13-comp	2013-08-31	1	7	0
Apal	2013	Ap-8-24-13-comp	2013-08-31	10	7	0
Apal	2013	Ap-8-24-13-comp	2013-08-31	11	7	0
Apal	2013	Ap-8-24-13-comp	2013-08-31	12	7	0
Apal	2013	Ap-8-24-13-comp	2013-08-31	2	7	0
Apal	2013	Ap-8-24-13-comp	2013-08-31	3	7	0
Apal	2013	Ap-8-24-13-comp	2013-08-31	4	7	0.1
Apal	2013	Ap-8-24-13-comp	2013-08-31	5	7	0
Apal	2013	Ap-8-24-13-comp	2013-08-31	6	7	0
Apal	2013	Ap-8-24-13-comp	2013-08-31	7	7	0
Apal	2013	Ap-8-24-13-comp	2013-08-31	8	7	0
Apal	2013	Ap-8-24-13-comp	2013-08-31	9	7	0
Apal	2014	Ap-8-15-14-comp	2014-08-22	1	7	0
Apal	2014	Ap-8-15-14-comp	2014-08-22	10	7	0
Apal	2014	Ap-8-15-14-comp	2014-08-22	11	7	0
Apal	2014	Ap-8-15-14-comp	2014-08-22	12	7	0
Apal	2014	Ap-8-15-14-comp	2014-08-22	2	7	0
Apal	2014	Ap-8-15-14-comp	2014-08-22	3	7	0
Apal	2014	Ap-8-15-14-comp	2014-08-22	4	7	0
Apal	2014	Ap-8-15-14-comp	2014-08-22	5	7	0
Apal	2014	Ap-8-15-14-comp	2014-08-22	6	7	0.1
Apal	2014	Ap-8-15-14-comp	2014-08-22	7	7	0
Apal	2014	Ap-8-15-14-comp	2014-08-22	8	7	0.1
Apal	2014	Ap-8-15-14-comp	2014-08-22	9	7	0
Apal	2016	Ap-8-21-16-comp	2016-08-28	1	7	0
Apal	2016	Ap-8-21-16-comp	2016-08-28	10	7	0
Apal	2016	Ap-8-21-16-comp	2016-08-28	11	7	0
Apal	2016	Ap-8-21-16-comp	2016-08-28	12	7	0.1
Apal	2016	Ap-8-21-16-comp	2016-08-28	2	7	0
Apal	2016	Ap-8-21-16-comp	2016-08-28	3	7	0.1
Apal	2016	Ap-8-21-16-comp	2016-08-28	4	7	0
Apal	2016	Ap-8-21-16-comp	2016-08-28	5	7	0
Apal	2016	Ap-8-21-16-comp	2016-08-28	6	7	0
Apal	2016	Ap-8-21-16-comp	2016-08-28	7	7	0.1
Apal	2016	Ap-8-21-16-comp	2016-08-28	8	7	0.3
Apal	2016	Ap-8-21-16-comp	2016-08-28	9	7	0.3
Acer	2017	Ac-8-10-17-comp	2017-08-17	1	7	0
Acer	2017	Ac-8-10-17-comp	2017-08-17	2	7	0
Acer	2017	Ac-8-10-17-comp	2017-08-17	3	7	0
Acer	2017	Ac-8-10-17-comp	2017-08-17	4	7	0
Acer	2017	Ac-8-10-17-comp	2017-08-17	5	7	0
Acer	2017	Ac-8-10-17-comp	2017-08-17	6	7	0
Acer	2017	Ac-8-10-17-comp	2017-08-17	7	7	0
Acer	2017	Ac-8-10-17-comp	2017-08-17	8	7	0
Acer	2017	Ac-8-10-17-comp	2017-08-17	9	7	0
Acer	2017	Ac-8-10-17-comp	2017-08-17	10	7	0
Acer	2017	Ac-8-10-17-comp	2017-08-17	11	7	0
Acer	2017	Ac-8-10-17-comp	2017-08-17	12	7	0
Apal	2013	Ap-8-24-13-comp	2013-09-01	1	8	0.2
Apal	2013	Ap-8-24-13-comp	2013-09-01	10	8	0.1
Apal	2013	Ap-8-24-13-comp	2013-09-01	11	8	0
Apal	2013	Ap-8-24-13-comp	2013-09-01	12	8	0
Apal	2013	Ap-8-24-13-comp	2013-09-01	2	8	0
Apal	2013	Ap-8-24-13-comp	2013-09-01	3	8	0
Apal	2013	Ap-8-24-13-comp	2013-09-01	4	8	0.1
Apal	2013	Ap-8-24-13-comp	2013-09-01	5	8	0.4
Apal	2013	Ap-8-24-13-comp	2013-09-01	6	8	0
Apal	2013	Ap-8-24-13-comp	2013-09-01	7	8	0
Apal	2013	Ap-8-24-13-comp	2013-09-01	8	8	0.1
Apal	2013	Ap-8-24-13-comp	2013-09-01	9	8	0.1
Apal	2014	Ap-8-15-14-comp	2014-08-23	1	8	0.4
Apal	2014	Ap-8-15-14-comp	2014-08-23	10	8	0.3
Apal	2014	Ap-8-15-14-comp	2014-08-23	11	8	0.2
Apal	2014	Ap-8-15-14-comp	2014-08-23	12	8	0.4
Apal	2014	Ap-8-15-14-comp	2014-08-23	2	8	0.2
Apal	2014	Ap-8-15-14-comp	2014-08-23	3	8	0.3
Apal	2014	Ap-8-15-14-comp	2014-08-23	4	8	0.1
Apal	2014	Ap-8-15-14-comp	2014-08-23	5	8	0.3
Apal	2014	Ap-8-15-14-comp	2014-08-23	6	8	0.8
Apal	2014	Ap-8-15-14-comp	2014-08-23	7	8	0.5
Apal	2014	Ap-8-15-14-comp	2014-08-23	8	8	0.2
Apal	2014	Ap-8-15-14-comp	2014-08-23	9	8	0.2
Apal	2016	Ap-8-21-16-comp	2016-08-29	1	8	0.3
Apal	2016	Ap-8-21-16-comp	2016-08-29	10	8	0
Apal	2016	Ap-8-21-16-comp	2016-08-29	11	8	0.1
Apal	2016	Ap-8-21-16-comp	2016-08-29	12	8	0
Apal	2016	Ap-8-21-16-comp	2016-08-29	2	8	0.1
Apal	2016	Ap-8-21-16-comp	2016-08-29	3	8	0.5
Apal	2016	Ap-8-21-16-comp	2016-08-29	4	8	0.01
Apal	2016	Ap-8-21-16-comp	2016-08-29	5	8	0.01
Apal	2016	Ap-8-21-16-comp	2016-08-29	6	8	0.4
Apal	2016	Ap-8-21-16-comp	2016-08-29	7	8	0.4
Apal	2016	Ap-8-21-16-comp	2016-08-29	8	8	0
Apal	2016	Ap-8-21-16-comp	2016-08-29	9	8	0
Acer	2017	Ac-8-10-17-comp	2017-08-18	1	8	0.2
Acer	2017	Ac-8-10-17-comp	2017-08-18	2	8	0.2
Acer	2017	Ac-8-10-17-comp	2017-08-18	3	8	0
Acer	2017	Ac-8-10-17-comp	2017-08-18	4	8	0.1
Acer	2017	Ac-8-10-17-comp	2017-08-18	5	8	0
Acer	2017	Ac-8-10-17-comp	2017-08-18	6	8	0
Acer	2017	Ac-8-10-17-comp	2017-08-18	7	8	0.1
Acer	2017	Ac-8-10-17-comp	2017-08-18	8	8	0
Acer	2017	Ac-8-10-17-comp	2017-08-18	9	8	0.2
Acer	2017	Ac-8-10-17-comp	2017-08-18	10	8	0
Acer	2017	Ac-8-10-17-comp	2017-08-18	11	8	0
Acer	2017	Ac-8-10-17-comp	2017-08-18	12	8	0
Apal	2013	Ap-8-24-13-comp	2013-09-02	1	9	0.1
Apal	2013	Ap-8-24-13-comp	2013-09-02	10	9	0
Apal	2013	Ap-8-24-13-comp	2013-09-02	11	9	0
Apal	2013	Ap-8-24-13-comp	2013-09-02	12	9	0.2
Apal	2013	Ap-8-24-13-comp	2013-09-02	2	9	0
Apal	2013	Ap-8-24-13-comp	2013-09-02	3	9	0
Apal	2013	Ap-8-24-13-comp	2013-09-02	4	9	0.2
Apal	2013	Ap-8-24-13-comp	2013-09-02	5	9	0
Apal	2013	Ap-8-24-13-comp	2013-09-02	6	9	0.2
Apal	2013	Ap-8-24-13-comp	2013-09-02	7	9	0
Apal	2013	Ap-8-24-13-comp	2013-09-02	8	9	0.1
Apal	2013	Ap-8-24-13-comp	2013-09-02	9	9	0
Apal	2014	Ap-8-15-14-comp	2014-08-24	1	9	0.7
Apal	2014	Ap-8-15-14-comp	2014-08-24	10	9	1
Apal	2014	Ap-8-15-14-comp	2014-08-24	11	9	0.6
Apal	2014	Ap-8-15-14-comp	2014-08-24	12	9	0.8
Apal	2014	Ap-8-15-14-comp	2014-08-24	2	9	0.7
Apal	2014	Ap-8-15-14-comp	2014-08-24	3	9	0.9
Apal	2014	Ap-8-15-14-comp	2014-08-24	4	9	0.9
Apal	2014	Ap-8-15-14-comp	2014-08-24	5	9	0.7
Apal	2014	Ap-8-15-14-comp	2014-08-24	6	9	0.9
Apal	2014	Ap-8-15-14-comp	2014-08-24	7	9	0.8
Apal	2014	Ap-8-15-14-comp	2014-08-24	8	9	0.7
Apal	2014	Ap-8-15-14-comp	2014-08-24	9	9	0.9
Acer	2017	Ac-8-10-17-comp	2017-08-19	1	9	0
Acer	2017	Ac-8-10-17-comp	2017-08-19	2	9	0.2
Acer	2017	Ac-8-10-17-comp	2017-08-19	3	9	0
Acer	2017	Ac-8-10-17-comp	2017-08-19	4	9	0
Acer	2017	Ac-8-10-17-comp	2017-08-19	5	9	0
Acer	2017	Ac-8-10-17-comp	2017-08-19	6	9	0
Acer	2017	Ac-8-10-17-comp	2017-08-19	7	9	0
Acer	2017	Ac-8-10-17-comp	2017-08-19	8	9	0.4
Acer	2017	Ac-8-10-17-comp	2017-08-19	9	9	0
Acer	2017	Ac-8-10-17-comp	2017-08-19	10	9	0.3
Acer	2017	Ac-8-10-17-comp	2017-08-19	11	9	0.5
Acer	2017	Ac-8-10-17-comp	2017-08-19	12	9	0
Apal	2013	Ap-8-24-13-comp	2013-09-03	1	10	0
Apal	2013	Ap-8-24-13-comp	2013-09-03	10	10	0.2
Apal	2013	Ap-8-24-13-comp	2013-09-03	11	10	0
Apal	2013	Ap-8-24-13-comp	2013-09-03	12	10	0.2
Apal	2013	Ap-8-24-13-comp	2013-09-03	2	10	0.1
Apal	2013	Ap-8-24-13-comp	2013-09-03	3	10	0
Apal	2013	Ap-8-24-13-comp	2013-09-03	4	10	0
Apal	2013	Ap-8-24-13-comp	2013-09-03	5	10	0
Apal	2013	Ap-8-24-13-comp	2013-09-03	6	10	0.1
Apal	2013	Ap-8-24-13-comp	2013-09-03	7	10	0
Apal	2013	Ap-8-24-13-comp	2013-09-03	8	10	0
Apal	2013	Ap-8-24-13-comp	2013-09-03	9	10	0
Apal	2014	Ap-8-15-14-comp	2014-08-25	1	10	0.2
Apal	2014	Ap-8-15-14-comp	2014-08-25	10	10	0.7
Apal	2014	Ap-8-15-14-comp	2014-08-25	11	10	0.8
Apal	2014	Ap-8-15-14-comp	2014-08-25	12	10	0.6
Apal	2014	Ap-8-15-14-comp	2014-08-25	2	10	0.8
Apal	2014	Ap-8-15-14-comp	2014-08-25	3	10	0.5
Apal	2014	Ap-8-15-14-comp	2014-08-25	4	10	0.5
Apal	2014	Ap-8-15-14-comp	2014-08-25	5	10	0.6
Apal	2014	Ap-8-15-14-comp	2014-08-25	6	10	0.1
Apal	2014	Ap-8-15-14-comp	2014-08-25	7	10	0.4
Apal	2014	Ap-8-15-14-comp	2014-08-25	8	10	0.5
Apal	2014	Ap-8-15-14-comp	2014-08-25	9	10	0.9
Apal	2016	Ap-8-21-16-comp	2016-08-31	1	10	0.1
Apal	2016	Ap-8-21-16-comp	2016-08-31	10	10	0.3
Apal	2016	Ap-8-21-16-comp	2016-08-31	11	10	0.8
Apal	2016	Ap-8-21-16-comp	2016-08-31	12	10	0
Apal	2016	Ap-8-21-16-comp	2016-08-31	2	10	0.3
Apal	2016	Ap-8-21-16-comp	2016-08-31	3	10	0.1
Apal	2016	Ap-8-21-16-comp	2016-08-31	4	10	0.1
Apal	2016	Ap-8-21-16-comp	2016-08-31	5	10	0.1
Apal	2016	Ap-8-21-16-comp	2016-08-31	6	10	0.2
Apal	2016	Ap-8-21-16-comp	2016-08-31	7	10	0
Apal	2016	Ap-8-21-16-comp	2016-08-31	8	10	0
Apal	2016	Ap-8-21-16-comp	2016-08-31	9	10	0
Acer	2017	Ac-8-10-17-comp	2017-08-20	1	10	0
Acer	2017	Ac-8-10-17-comp	2017-08-20	2	10	0.2
Acer	2017	Ac-8-10-17-comp	2017-08-20	3	10	0.3
Acer	2017	Ac-8-10-17-comp	2017-08-20	4	10	0
Acer	2017	Ac-8-10-17-comp	2017-08-20	5	10	0
Acer	2017	Ac-8-10-17-comp	2017-08-20	6	10	0.2
Acer	2017	Ac-8-10-17-comp	2017-08-20	7	10	0.2
Acer	2017	Ac-8-10-17-comp	2017-08-20	8	10	0
Acer	2017	Ac-8-10-17-comp	2017-08-20	9	10	0.1
Acer	2017	Ac-8-10-17-comp	2017-08-20	10	10	0.2
Acer	2017	Ac-8-10-17-comp	2017-08-20	11	10	0
Acer	2017	Ac-8-10-17-comp	2017-08-20	12	10	0
Apal	2013	Ap-8-24-13-comp	2013-09-04	1	11	0
Apal	2013	Ap-8-24-13-comp	2013-09-04	10	11	0
Apal	2013	Ap-8-24-13-comp	2013-09-04	11	11	0
Apal	2013	Ap-8-24-13-comp	2013-09-04	12	11	0
Apal	2013	Ap-8-24-13-comp	2013-09-04	2	11	0
Apal	2013	Ap-8-24-13-comp	2013-09-04	3	11	0.1
Apal	2013	Ap-8-24-13-comp	2013-09-04	4	11	0
Apal	2013	Ap-8-24-13-comp	2013-09-04	5	11	0
Apal	2013	Ap-8-24-13-comp	2013-09-04	6	11	0.2
Apal	2013	Ap-8-24-13-comp	2013-09-04	7	11	0
Apal	2013	Ap-8-24-13-comp	2013-09-04	8	11	0
Apal	2013	Ap-8-24-13-comp	2013-09-04	9	11	0
Apal	2014	Ap-8-15-14-comp	2014-08-26	1	11	0.8
Apal	2014	Ap-8-15-14-comp	2014-08-26	10	11	0.9
Apal	2014	Ap-8-15-14-comp	2014-08-26	11	11	0.6
Apal	2014	Ap-8-15-14-comp	2014-08-26	12	11	0.6
Apal	2014	Ap-8-15-14-comp	2014-08-26	2	11	0.8
Apal	2014	Ap-8-15-14-comp	2014-08-26	3	11	1
Apal	2014	Ap-8-15-14-comp	2014-08-26	4	11	0.7
Apal	2014	Ap-8-15-14-comp	2014-08-26	5	11	0.9
Apal	2014	Ap-8-15-14-comp	2014-08-26	6	11	0.8
Apal	2014	Ap-8-15-14-comp	2014-08-26	7	11	0.9
Apal	2014	Ap-8-15-14-comp	2014-08-26	8	11	0.7
Apal	2014	Ap-8-15-14-comp	2014-08-26	9	11	0.8
Apal	2016	Ap-8-21-16-comp	2016-09-01	1	11	0.3
Apal	2016	Ap-8-21-16-comp	2016-09-01	10	11	0.2
Apal	2016	Ap-8-21-16-comp	2016-09-01	11	11	0
Apal	2016	Ap-8-21-16-comp	2016-09-01	12	11	0.2
Apal	2016	Ap-8-21-16-comp	2016-09-01	2	11	0.2
Apal	2016	Ap-8-21-16-comp	2016-09-01	3	11	0
Apal	2016	Ap-8-21-16-comp	2016-09-01	4	11	0.1
Apal	2016	Ap-8-21-16-comp	2016-09-01	5	11	0
Apal	2016	Ap-8-21-16-comp	2016-09-01	6	11	0.2
Apal	2016	Ap-8-21-16-comp	2016-09-01	7	11	0.3
Apal	2016	Ap-8-21-16-comp	2016-09-01	8	11	0.1
Apal	2016	Ap-8-21-16-comp	2016-09-01	9	11	0.1
Acer	2017	Ac-8-10-17-comp	2017-08-21	1	11	0.4
Acer	2017	Ac-8-10-17-comp	2017-08-21	2	11	0.5
Acer	2017	Ac-8-10-17-comp	2017-08-21	3	11	0
Acer	2017	Ac-8-10-17-comp	2017-08-21	4	11	0.1
Acer	2017	Ac-8-10-17-comp	2017-08-21	5	11	0
Acer	2017	Ac-8-10-17-comp	2017-08-21	6	11	0.6
Acer	2017	Ac-8-10-17-comp	2017-08-21	7	11	0.4
Acer	2017	Ac-8-10-17-comp	2017-08-21	8	11	0.6
Acer	2017	Ac-8-10-17-comp	2017-08-21	9	11	0.6
Acer	2017	Ac-8-10-17-comp	2017-08-21	10	11	0.8
Acer	2017	Ac-8-10-17-comp	2017-08-21	11	11	0.4
Acer	2017	Ac-8-10-17-comp	2017-08-21	12	11	0.4
Apal	2014	Ap-8-15-14-comp	2014-08-27	1	12	0.7
Apal	2014	Ap-8-15-14-comp	2014-08-27	10	12	0.6
Apal	2014	Ap-8-15-14-comp	2014-08-27	11	12	0
Apal	2014	Ap-8-15-14-comp	2014-08-27	12	12	0.1
Apal	2014	Ap-8-15-14-comp	2014-08-27	2	12	0.7
Apal	2014	Ap-8-15-14-comp	2014-08-27	3	12	1
Apal	2014	Ap-8-15-14-comp	2014-08-27	4	12	0.4
Apal	2014	Ap-8-15-14-comp	2014-08-27	5	12	0.6
Apal	2014	Ap-8-15-14-comp	2014-08-27	6	12	0.8
Apal	2014	Ap-8-15-14-comp	2014-08-27	7	12	0.4
Apal	2014	Ap-8-15-14-comp	2014-08-27	8	12	0.6
Apal	2014	Ap-8-15-14-comp	2014-08-27	9	12	0.7
Apal	2016	Ap-8-21-16-comp	2016-09-02	1	12	0
Apal	2016	Ap-8-21-16-comp	2016-09-02	10	12	0.1
Apal	2016	Ap-8-21-16-comp	2016-09-02	11	12	0
Apal	2016	Ap-8-21-16-comp	2016-09-02	12	12	0.1
Apal	2016	Ap-8-21-16-comp	2016-09-02	2	12	0.1
Apal	2016	Ap-8-21-16-comp	2016-09-02	3	12	0
Apal	2016	Ap-8-21-16-comp	2016-09-02	4	12	0
Apal	2016	Ap-8-21-16-comp	2016-09-02	5	12	0
Apal	2016	Ap-8-21-16-comp	2016-09-02	6	12	0
Apal	2016	Ap-8-21-16-comp	2016-09-02	7	12	0.4
Apal	2016	Ap-8-21-16-comp	2016-09-02	8	12	0
Apal	2016	Ap-8-21-16-comp	2016-09-02	9	12	0
Acer	2017	Ac-8-10-17-comp	2017-08-22	1	12	0.1
Acer	2017	Ac-8-10-17-comp	2017-08-22	2	12	0.1
Acer	2017	Ac-8-10-17-comp	2017-08-22	3	12	0.7
Acer	2017	Ac-8-10-17-comp	2017-08-22	4	12	0.6
Acer	2017	Ac-8-10-17-comp	2017-08-22	5	12	0
Acer	2017	Ac-8-10-17-comp	2017-08-22	6	12	0.1
Acer	2017	Ac-8-10-17-comp	2017-08-22	7	12	0.5
Acer	2017	Ac-8-10-17-comp	2017-08-22	8	12	0
Acer	2017	Ac-8-10-17-comp	2017-08-22	9	12	0
Acer	2017	Ac-8-10-17-comp	2017-08-22	10	12	0
Acer	2017	Ac-8-10-17-comp	2017-08-22	11	12	1
Acer	2017	Ac-8-10-17-comp	2017-08-22	12	12	0.3
Apal	2013	Ap-8-24-13-comp	2013-09-06	1	13	0
Apal	2013	Ap-8-24-13-comp	2013-09-06	10	13	0
Apal	2013	Ap-8-24-13-comp	2013-09-06	11	13	0.1
Apal	2013	Ap-8-24-13-comp	2013-09-06	12	13	0
Apal	2013	Ap-8-24-13-comp	2013-09-06	2	13	0.2
Apal	2013	Ap-8-24-13-comp	2013-09-06	3	13	0
Apal	2013	Ap-8-24-13-comp	2013-09-06	4	13	0
Apal	2013	Ap-8-24-13-comp	2013-09-06	5	13	0
Apal	2013	Ap-8-24-13-comp	2013-09-06	6	13	0
Apal	2013	Ap-8-24-13-comp	2013-09-06	7	13	0.2
Apal	2013	Ap-8-24-13-comp	2013-09-06	8	13	0
Apal	2013	Ap-8-24-13-comp	2013-09-06	9	13	0.1
Apal	2014	Ap-8-15-14-comp	2014-08-28	1	13	0.4
Apal	2014	Ap-8-15-14-comp	2014-08-28	10	13	0.8
Apal	2014	Ap-8-15-14-comp	2014-08-28	11	13	0.4
Apal	2014	Ap-8-15-14-comp	2014-08-28	12	13	0.7
Apal	2014	Ap-8-15-14-comp	2014-08-28	2	13	0.7
Apal	2014	Ap-8-15-14-comp	2014-08-28	3	13	0.5
Apal	2014	Ap-8-15-14-comp	2014-08-28	4	13	0.7
Apal	2014	Ap-8-15-14-comp	2014-08-28	5	13	0.4
Apal	2014	Ap-8-15-14-comp	2014-08-28	6	13	0
Apal	2014	Ap-8-15-14-comp	2014-08-28	7	13	0.4
Apal	2014	Ap-8-15-14-comp	2014-08-28	8	13	0.5
Apal	2014	Ap-8-15-14-comp	2014-08-28	9	13	0.5
Apal	2016	Ap-8-21-16-comp	2016-09-03	1	13	0
Apal	2016	Ap-8-21-16-comp	2016-09-03	10	13	0
Apal	2016	Ap-8-21-16-comp	2016-09-03	11	13	0
Apal	2016	Ap-8-21-16-comp	2016-09-03	12	13	0
Apal	2016	Ap-8-21-16-comp	2016-09-03	2	13	0
Apal	2016	Ap-8-21-16-comp	2016-09-03	3	13	0
Apal	2016	Ap-8-21-16-comp	2016-09-03	4	13	0
Apal	2016	Ap-8-21-16-comp	2016-09-03	5	13	0
Apal	2016	Ap-8-21-16-comp	2016-09-03	6	13	0
Apal	2016	Ap-8-21-16-comp	2016-09-03	7	13	0
Apal	2016	Ap-8-21-16-comp	2016-09-03	8	13	0.1
Apal	2016	Ap-8-21-16-comp	2016-09-03	9	13	0.1
Acer	2017	Ac-8-10-17-comp	2017-08-23	1	13	0.5
Acer	2017	Ac-8-10-17-comp	2017-08-23	2	13	0.7
Acer	2017	Ac-8-10-17-comp	2017-08-23	3	13	0.9
Acer	2017	Ac-8-10-17-comp	2017-08-23	4	13	0.9
Acer	2017	Ac-8-10-17-comp	2017-08-23	5	13	0.4
Acer	2017	Ac-8-10-17-comp	2017-08-23	6	13	0.5
Acer	2017	Ac-8-10-17-comp	2017-08-23	7	13	0.5
Acer	2017	Ac-8-10-17-comp	2017-08-23	8	13	0
Acer	2017	Ac-8-10-17-comp	2017-08-23	9	13	0.3
Acer	2017	Ac-8-10-17-comp	2017-08-23	10	13	0.5
Acer	2017	Ac-8-10-17-comp	2017-08-23	11	13	0.4
Acer	2017	Ac-8-10-17-comp	2017-08-23	12	13	0
Apal	2014	Ap-8-15-14-comp	2014-08-29	1	14	0.3
Apal	2014	Ap-8-15-14-comp	2014-08-29	10	14	0.7
Apal	2014	Ap-8-15-14-comp	2014-08-29	11	14	0.5
Apal	2014	Ap-8-15-14-comp	2014-08-29	12	14	0.7
Apal	2014	Ap-8-15-14-comp	2014-08-29	2	14	0.6
Apal	2014	Ap-8-15-14-comp	2014-08-29	3	14	0.1
Apal	2014	Ap-8-15-14-comp	2014-08-29	4	14	0.4
Apal	2014	Ap-8-15-14-comp	2014-08-29	5	14	0.4
Apal	2014	Ap-8-15-14-comp	2014-08-29	6	14	0.5
Apal	2014	Ap-8-15-14-comp	2014-08-29	7	14	0.6
Apal	2014	Ap-8-15-14-comp	2014-08-29	8	14	0.8
Apal	2014	Ap-8-15-14-comp	2014-08-29	9	14	0.4
Apal	2016	Ap-8-21-16-comp	2016-09-04	1	14	0
Apal	2016	Ap-8-21-16-comp	2016-09-04	10	14	0.3
Apal	2016	Ap-8-21-16-comp	2016-09-04	2	14	0.1
Apal	2016	Ap-8-21-16-comp	2016-09-04	3	14	0
Apal	2016	Ap-8-21-16-comp	2016-09-04	4	14	0
Apal	2016	Ap-8-21-16-comp	2016-09-04	5	14	0
Apal	2016	Ap-8-21-16-comp	2016-09-04	6	14	0.1
Apal	2016	Ap-8-21-16-comp	2016-09-04	7	14	0.4
Apal	2016	Ap-8-21-16-comp	2016-09-04	8	14	0.1
Apal	2016	Ap-8-21-16-comp	2016-09-04	9	14	0.1
Apal	2014	Ap-8-15-14-comp	2014-08-30	1	15	0.7
Apal	2014	Ap-8-15-14-comp	2014-08-30	10	15	0.5
Apal	2014	Ap-8-15-14-comp	2014-08-30	11	15	0.2
Apal	2014	Ap-8-15-14-comp	2014-08-30	12	15	0.4
Apal	2014	Ap-8-15-14-comp	2014-08-30	2	15	0.8
Apal	2014	Ap-8-15-14-comp	2014-08-30	3	15	0.7
Apal	2014	Ap-8-15-14-comp	2014-08-30	4	15	0.7
Apal	2014	Ap-8-15-14-comp	2014-08-30	5	15	0.7
Apal	2014	Ap-8-15-14-comp	2014-08-30	6	15	0.5
Apal	2014	Ap-8-15-14-comp	2014-08-30	7	15	0.5
Apal	2014	Ap-8-15-14-comp	2014-08-30	8	15	0.3
Apal	2014	Ap-8-15-14-comp	2014-08-30	9	15	0.8
Acer	2017	Ac-8-10-17-comp	2017-08-24	1	15	0.6
Acer	2017	Ac-8-10-17-comp	2017-08-24	2	15	0.4
Acer	2017	Ac-8-10-17-comp	2017-08-24	3	15	0.7
Acer	2017	Ac-8-10-17-comp	2017-08-24	4	15	0.7
Acer	2017	Ac-8-10-17-comp	2017-08-24	5	15	0.9
Acer	2017	Ac-8-10-17-comp	2017-08-24	6	15	0.5
Acer	2017	Ac-8-10-17-comp	2017-08-24	7	15	0.9
Acer	2017	Ac-8-10-17-comp	2017-08-24	8	15	0.2
Acer	2017	Ac-8-10-17-comp	2017-08-24	9	15	0.8
Acer	2017	Ac-8-10-17-comp	2017-08-24	10	15	0.7
Acer	2017	Ac-8-10-17-comp	2017-08-24	11	15	0.8
Acer	2017	Ac-8-10-17-comp	2017-08-24	12	15	0.8
Apal	2014	Ap-8-15-14-comp	2014-09-01	1	17	0.2
Apal	2014	Ap-8-15-14-comp	2014-09-01	10	17	0.2
Apal	2014	Ap-8-15-14-comp	2014-09-01	11	17	0.6
Apal	2014	Ap-8-15-14-comp	2014-09-01	12	17	0.3
Apal	2014	Ap-8-15-14-comp	2014-09-01	2	17	0.4
Apal	2014	Ap-8-15-14-comp	2014-09-01	3	17	0.2
Apal	2014	Ap-8-15-14-comp	2014-09-01	4	17	0.2
Apal	2014	Ap-8-15-14-comp	2014-09-01	5	17	0.2
Apal	2014	Ap-8-15-14-comp	2014-09-01	6	17	0.4
Apal	2014	Ap-8-15-14-comp	2014-09-01	7	17	0.5
Apal	2014	Ap-8-15-14-comp	2014-09-01	8	17	0.5
Apal	2014	Ap-8-15-14-comp	2014-09-01	9	17	0.4
Acer	2017	Ac-8-10-17-comp	2017-09-06	1W	27	0.27
Acer	2017	Ac-8-10-17-comp	2017-09-06	2W	27	0.1
Acer	2017	Ac-8-10-17-comp	2017-09-06	3W	27	0.7
Acer	2017	Ac-8-10-17-comp	2017-09-06	4W	27	0
Acer	2017	Ac-8-10-17-comp	2017-09-06	5W	27	0
Acer	2017	Ac-8-10-17-comp	2017-09-06	6W	27	0.1
Acer	2017	Ac-8-10-17-comp	2017-09-06	7W	27	0
Acer	2017	Ac-8-10-17-comp	2017-09-06	8W	27	0.2
Acer	2017	Ac-8-10-17-comp	2017-09-06	9W	27	0
Acer	2017	Ac-8-10-17-comp	2017-09-06	1	27	0.27
Acer	2017	Ac-8-10-17-comp	2017-09-06	2	27	0.5
Acer	2017	Ac-8-10-17-comp	2017-09-06	3	27	0.5
Acer	2017	Ac-8-10-17-comp	2017-09-06	4	27	0
Acer	2017	Ac-8-10-17-comp	2017-09-06	5	27	0
Acer	2017	Ac-8-10-17-comp	2017-09-06	6	27	0.2
Acer	2017	Ac-8-10-17-comp	2017-09-06	7	27	0
Acer	2017	Ac-8-10-17-comp	2017-09-06	8	27	0
Acer	2017	Ac-8-10-17-comp	2017-09-06	9	27	0
Acer	2017	Ac-8-10-17-comp	2017-09-06	10	27	0.3
Acer	2017	Ac-8-10-17-comp	2017-09-06	11	27	0.5
Acer	2017	Ac-8-10-17-comp	2017-09-06	12	27	0
Acer	2017	Ac-8-10-17-comp	2017-09-06	13	27	0.1
Apal	2016	Ap-8-21-16-comp	2016-09-27	1	36	0.9
Apal	2016	Ap-8-21-16-comp	2016-09-27	10	36	0.8
Apal	2016	Ap-8-21-16-comp	2016-09-27	11	36	0
Apal	2016	Ap-8-21-16-comp	2016-09-27	12	36	0
Apal	2016	Ap-8-21-16-comp	2016-09-27	13	36	0.2
Apal	2016	Ap-8-21-16-comp	2016-09-27	14	36	0
Apal	2016	Ap-8-21-16-comp	2016-09-27	15	36	0
Apal	2016	Ap-8-21-16-comp	2016-09-27	16	36	0.7
Apal	2016	Ap-8-21-16-comp	2016-09-27	17	36	0.3
Apal	2016	Ap-8-21-16-comp	2016-09-27	18	36	0.1
Apal	2016	Ap-8-21-16-comp	2016-09-27	2	36	0.4
Apal	2016	Ap-8-21-16-comp	2016-09-27	3	36	0
Apal	2016	Ap-8-21-16-comp	2016-09-27	4	36	0.6
Apal	2016	Ap-8-21-16-comp	2016-09-27	5	36	0
Apal	2016	Ap-8-21-16-comp	2016-09-27	6	36	0
Apal	2016	Ap-8-21-16-comp	2016-09-27	7	36	0.5
Apal	2016	Ap-8-21-16-comp	2016-09-27	8	36	0.3
Apal	2016	Ap-8-21-16-comp	2016-09-27	9	36	0.3
